# Supplementary material for: Unravelling the role of crustose coralline algae microbiomes on coral larval settlement in the Great Barrier Reef
Source: Research Square preprint supplement (doi:10.21203/rs.3.rs-7850943/v1), 2025-10-21
Supplement: Supplementary file 1 [file 81bee4d8b128dd68143a5646.docx]

**Supplementary Information**


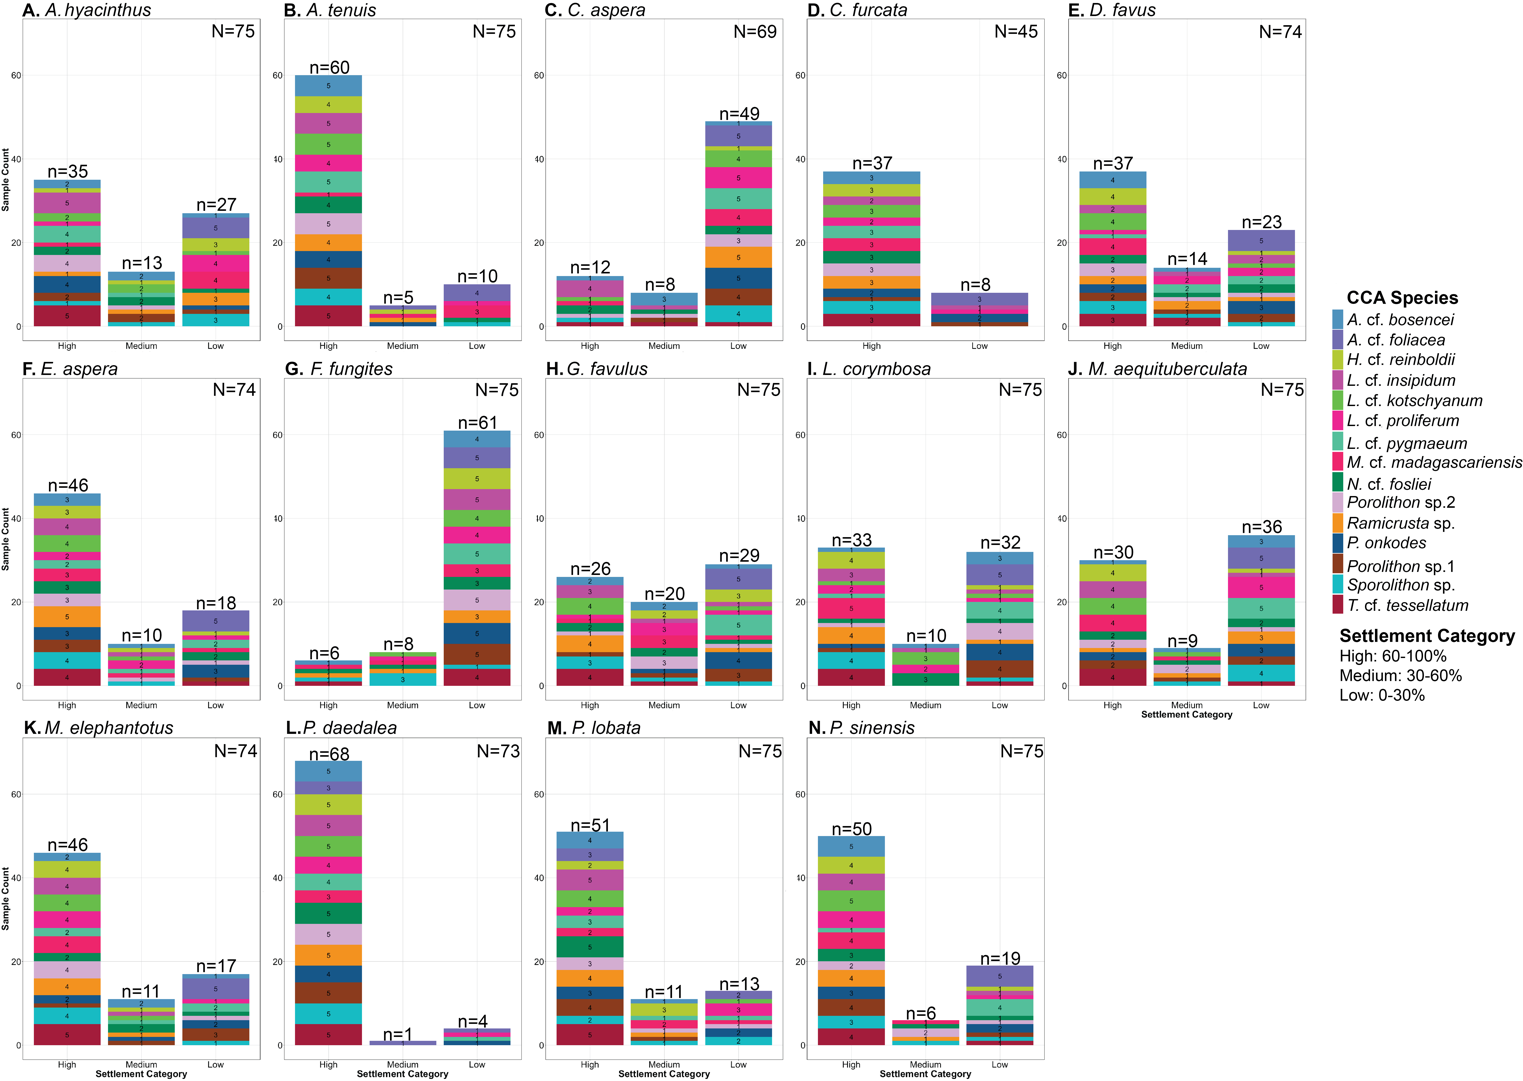


Figure S1. Distributions of crustose coralline algae (CCA) amongst settlement categories for each coral species.

Table S1. Crustose coralline algae (CCA) collection information adapted from Abdul Wahab *et al.* (2023).

| CCA Species | Collection site | Sampling Depth (m) | Habitat | Light Exposure |
| --- | --- | --- | --- | --- |
|
| *Adeylithon* cf. *bosencei* | Davies Reef | 2-4 | Shallow – Deep reef | High |
| *Amphiroa* cf.  *foliacea* | Davies Reef | 4 | Shallow – Mid reef | High |
| *Hydrolithon* cf. *reinboldii* | Havannah Island | 2-3 | Shallow – Deep reef | Moderate |
| *Lithophyllum* cf. *insipidium* | Havannah Island | 2-3 | Crest, Shallow reef | High |
| *Lithophyllum* cf. *kotschyanum* | Davies Reef | 4 | Reef Crest | High |
| *Lithothamnion* cf.  *proliferum* | Davies Reef | 6 | Crevices, Caves | Low |
| *Lithophyllum* cf. *pygmaeum* | Davies Reef | 4 | Crest, Shallow reef | High |
| *Melyvonnea* cf. *madagascariensis* | Davies Reef | 4-5 | Shallow – Deep reef | Moderate |
| *Neogoniolithon* cf. *fosliei* | Davies Reef | 3 | Reef Crest | High |
| *Ramicrusta* sp. | Davies Reef | 4 | Crevices, Caves | Low |
| *Porolithon onkodes* | Davies Reef | 2 | Reef Crest | High |
| *Porolithon* sp.1 | Davies Reef | 2 | Reef Crest | High |
| *Porolithon* sp.2 | Havannah Island | 3 | Reef Crest | High |
| *Sporolithon sp.* | Davies Reef | 6 | Crevices, Caves | Low |
| *Titanoderma* cf. *tessellatum* | Davies Reef | 4 | Shallow – Deep reef | Moderate |

Table S2: October coral spawning species collection information adapted from Abdul Wahab *et al.* (2023). These corals were used in settlement assays with crustose coralline algae (CCA) collected and held in aquaria for ~1.5 weeks.

| Coral Species | Coral Family | Collection Location | Spawning Date | Spawning Time | Larval Age (days) |
| --- | --- | --- | --- | --- | --- |
| *Acropora tenuis* | Acroporidae | Palm and Magnetic Islands | 24th October 2021 | 18:00 – 19:05 h | 6 |
| *Montiopora aequituberculata* | Palm Islands | 25th October 2021 | 19:38 – 20:50 h | 6 |
| *Echinophyllia aspera* | Lobophylliidae | Magnetic Island | 28th October 2021 | 20:15 – 20:30 h | 5 |
| *Goniastrea favulus* | Merulinidae | Magnetic Island | 24th October 2021 | 19:20 h | 8 |
| *Coelastrea aspera* | 24th October 2021 | 21:20 – 21:34 h | 8 |
| *Dispastrea favus* | 23rd October 2021 | 19:45 – 20:07 h | 4 |
| *Platygrya sinensis* | 24th Octboer 2021 | 19:34 – 20:04 h | 4 |

Table S3: November coral spawning species collection information adapted from Abdul Wahab *et al.* (2023). These corals were used in settlement assays with crustose coralline algae (CCA) collected and held in aquaria for ~1.5 months.

| Coral Species | Coral Family | Location | Spawning Date | Spawning Time | Larval Age (days) |
| --- | --- | --- | --- | --- | --- |
| *Acropora hyacinthus* | Acroporidae | Davies Reef | 29th November 2021 | 21:45 – 23:37 h | 7 |
| *Caulastrea furcata* | Merulinidae | Palm Islands | 23rd November 2021 | 19:50 – 20:39 h | 6 |
| *Mycedium elephantotus* | Davies Reef | 24th November 2021 | 20:54 h | 8 |
| *Platygyra daedalea* | Palm Islands | 23rd November 2021 | 18:50 h | 6 |
| *Fungia fungites* | Fungiidae | National Sea Simulator aquarium facility at the Australian Institute of Marine Science captive | 25th November 2021 | 18:37 – 19:26 h | 8 |
| *Lobophyllia corymbosa* | Lobophylliidae | Palm Islands | 26th November 2021 | 19:27 h | 8 |
| *Porites lobata* | Poritidae | Palm Islands | 25th November 2021 | 21:15 – 21:32 h | 6 |

Table S4. Settlement assay sample settlement results (%) for each coral species per each crustose coralline algae (CCA) species. Samples chosen for 16S amplicon sequencing are denoted with an asterisk.

| *Coral Species* | *CCA Species* | Sample ID | % Settlement | 16S Sequencing |
| --- | --- | --- | --- | --- |
| *Acropora hyacinthus* | *Adeylithon* cf. *bosencei* | 3499 | 10 | ***** |
| 3491 | 20 |  |
| 3311 | 20 |  |
| 3390 | 33.33333333 |  |
| 3350 | 40 | ***** |
| 3449 | 44.44444444 |  |
| 3327 | 50 | ***** |
| 3486 | 60 | ***** |
| 3425 | 66.66666667 |  |
| 3362 | 70 |  |
| 3426 | 77.77777778 |  |
| 3353 | 88.88888889 | ***** |
| *Amphiroa* cf. *foliacea* | 3326 | 0 | ***** |
| 3356 | 0 | ***** |
| 3483 | 0 |  |
| 3339 | 0 | ***** |
| 3376 | 0 |  |
| 3487 | 0 |  |
| 3429 | 0 | ***** |
| 3443 | 0 |  |
| 3393 | 0 | ***** |
| 3466 | 0 |  |
| 3472 | 0 |  |
| 3347 | 50 |  |
| Aragonite tile | 3383 | 0 |  |
| 3502 | 0 |  |
| 3500 | 0 |  |
| 3314 | 0 | ***** |
| 3411 | 0 |  |
| 3340 | 0 |  |
| 3320 | 0 |  |
| 3436 | 0 |  |
| 3501 | 10 |  |
| 3338 | 11.11111111 |  |
| 3495 | 30 |  |
| 3465 | 44.44444444 |  |
| *Hydorlithon* cf. *reinboldii* | 3505 | 0 | ***** |
| 3408 | 0 |  |
| 3396 | 11.11111111 |  |
| 3405 | 20 |  |
| 3380 | 22.22222222 | ***** |
| 3489 | 30 |  |
| 3357 | 30 | ***** |
| 3497 | 33.33333333 |  |
| 3358 | 40 | ***** |
| 3485 | 50 |  |
| 3439 | 60 |  |
| 3328 | 63.63636364 | ***** |
| *Lithophyllum* cf. *insipidium* | 3407 | 66.66666667 | ***** |
| 3403 | 70 |  |
| 3351 | 70 |  |
| 3418 | 77.77777778 | ***** |
| 3471 | 80 |  |
| 3430 | 80 | ***** |
| 3309 | 80 |  |
| 3400 | 88.88888889 | ***** |
| 3325 | 90 |  |
| 3341 | 90 |  |
| 3424 | 100 | ***** |
| 3416 | 100 |  |
| *Lithophyllum* cf. *kotschyanum* | 3417 | 22.22222222 | ***** |
| 3448 | 30 |  |
| 3366 | 30 |  |
| 3363 | 50 |  |
| 3378 | 50 | ***** |
| 3463 | 55.55555556 | ***** |
| 3415 | 60 | ***** |
| 3442 | 60 |  |
| 3334 | 60 |  |
| 3319 | 70 |  |
| 3509 | 80 |  |
| 3305 | 90 | ***** |
| *Lithothamnion* cf. *proliferum* | 3457 | 0 |  |
| 3387 | 0 |  |
| 3433 | 0 | ***** |
| 3412 | 0 |  |
| 3352 | 0 |  |
| 3493 | 10 |  |
| 3479 | 12.5 | ***** |
| 3475 | 22.22222222 | ***** |
| 3467 | 30 | ***** |
| 3451 | 60 |  |
| 3477 | 70 |  |
| 3399 | 80 | ***** |
| *Lithophyllum* cf. *pygmaeum* | 3317 | 50 | ***** |
| 3377 | 55.55555556 |  |
| 3427 | 60 |  |
| 3504 | 70 | ***** |
| 3385 | 80 | ***** |
| 3452 | 90 | ***** |
| 3461 | 90 |  |
| 3508 | 90 |  |
| 3404 | 90 |  |
| 3409 | 90 |  |
| 3329 | 90 |  |
| 3440 | 90.90909091 | ***** |
| *Melyvonnea* cf. *madagascariensis* | 3348 | 0 | ***** |
| 3368 | 0 |  |
| 3431 | 10 |  |
| 3343 | 20 |  |
| 3389 | 20 |  |
| 3437 | 20 | ***** |
| 3480 | 25 | ***** |
| 3342 | 27.27272727 | ***** |
| 3355 | 33.33333333 |  |
| 3386 | 40 |  |
| 3482 | 50 |  |
| 3398 | 71.42857143 | ***** |
| *Neogoniolithon* cf. *fosliei* | 3371 | 0 | ***** |
| 3446 | 20 |  |
| 3298 | 25 |  |
| 3432 | 40 |  |
| 3419 | 50 | ***** |
| 3413 | 55.55555556 | ***** |
| 3455 | 70 | ***** |
| 3481 | 70 |  |
| 3414 | 70 |  |
| 3438 | 77.77777778 |  |
| 3365 | 90 |  |
| 3484 | 90 | ***** |
| *Porolithon onkodes* | 3382 | 10 | ***** |
| 3494 | 40 |  |
| 3308 | 54.54545455 |  |
| 3369 | 60 |  |
| 3464 | 60 | ***** |
| 3406 | 66.66666667 | ***** |
| 3312 | 70 | ***** |
| 3295 | 70 |  |
| 3374 | 77.77777778 |  |
| 3402 | 80 |  |
| 3335 | 80 | ***** |
| 3364 | 80 |  |
| *Porolithon* sp.1 | 3394 | 20 | ***** |
| 3462 | 30 |  |
| 3316 | 30 |  |
| 3318 | 40 |  |
| 3460 | 50 | ***** |
| 3401 | 50 | ***** |
| 3361 | 50 |  |
| 3421 | 60 | ***** |
| 3468 | 60 |  |
| 3330 | 60 |  |
| 3322 | 80 |  |
| 3445 | 80 | ***** |
| *Porolithon* sp.2 | 3453 | 44.44444444 | ***** |
| 3441 | 50 |  |
| 3459 | 50 |  |
| 3310 | 60 |  |
| 3420 | 60 |  |
| 3336 | 80 | ***** |
| 3321 | 80 |  |
| 3302 | 80 | ***** |
| 3474 | 80 | ***** |
| 3444 | 90 |  |
| 3473 | 90 |  |
| 3337 | 100 | ***** |
| *Ramicrusta* sp. | 3450 | 0 | ***** |
| 3301 | 10 |  |
| 3367 | 10 |  |
| 3296 | 11.11111111 |  |
| 3307 | 20 |  |
| 3454 | 22.22222222 | ***** |
| 3422 | 30 | ***** |
| 3423 | 44.44444444 | ***** |
| 3478 | 50 |  |
| 3492 | 50 |  |
| 3300 | 70 |  |
| 3315 | 90 | ***** |
| *Sporolithon* sp. | 3332 | 0 |  |
| 3299 | 0 | ***** |
| 3379 | 0 |  |
| 3458 | 9.090909091 |  |
| 3469 | 11.11111111 |  |
| 3304 | 25 | ***** |
| 3506 | 30 | ***** |
| 3435 | 40 | ***** |
| 3297 | 44.44444444 |  |
| 3346 | 60 |  |
| 3391 | 60 |  |
| 3360 | 80 | ***** |
| *Titanoderma* cf. *tessellatum* | 3503 | 70 | ***** |
| 3470 | 77.77777778 |  |
| 3372 | 80 |  |
| 3488 | 80 | ***** |
| 3476 | 80 |  |
| 3313 | 80 |  |
| 3428 | 80 | ***** |
| 3388 | 80 |  |
| 3324 | 80 | ***** |
| 3349 | 80 |  |
| 3447 | 88.88888889 |  |
| 3333 | 90 | ***** |
| *Acropora tenuis* | *Adeylithon* cf. *bosencei* | 1064 | 70 | ***** |
| 1065 | 80 |  |
| 1015 | 80 |  |
| 1056 | 81.81818182 |  |
| 939 | 90 | ***** |
| 1050 | 90 | ***** |
| 956 | 90 |  |
| 894 | 90 | ***** |
| 923 | 100 |  |
| 1074 | 100 |  |
| 1062 | 100 | ***** |
| 1012 | 100 |  |
| *Amphiroa* cf. *foliacea* | 959 | 0 |  |
| 912 | 0 | ***** |
| 899 | 0 |  |
| 874 | 10 | ***** |
| 1036 | 10 |  |
| 1059 | 10 |  |
| 1048 | 20 | ***** |
| 1052 | 20 |  |
| 876 | 20 | ***** |
| 878 | 33.33333333 |  |
| 872 | 40 |  |
| 865 | 40 | ***** |
| Aragonite tile | 1041 | 0 |  |
| 1054 | 0 |  |
| 992 | 0 |  |
| 919 | 0 | ***** |
| 901 | 0 |  |
| 1001 | 0 |  |
| 1019 | 14.28571429 |  |
| 1046 | 20 |  |
| 1020 | 22.22222222 |  |
| 1032 | 27.27272727 |  |
| 955 | 30 |  |
| 884 | 50 |  |
| *Hydorlithon* cf. *reinboldii* | 951 | 50 | ***** |
| 968 | 80 |  |
| 870 | 81.81818182 |  |
| 1024 | 90 |  |
| 1068 | 90 | ***** |
| 879 | 90 | ***** |
| 945 | 90 |  |
| 961 | 90 | ***** |
| 925 | 100 |  |
| 1004 | 100 | ***** |
| 1000 | 100 |  |
| 943 | 100 |  |
| *Lithophyllum* cf. *insipidium* | 1075 | 70 | ***** |
| 914 | 80 |  |
| 896 | 80 |  |
| 1031 | 81.81818182 |  |
| 902 | 90 | ***** |
| 1022 | 90 | ***** |
| 1072 | 100 |  |
| 967 | 100 |  |
| 1045 | 100 | ***** |
| 922 | 100 |  |
| 1044 | 100 | ***** |
| 938 | 100 |  |
| *Lithophyllum* cf. *kotschyanum* | 960 | 88.88888889 | ***** |
| 1026 | 90 | ***** |
| 969 | 90 |  |
| 979 | 90 | ***** |
| 882 | 90 | ***** |
| 1025 | 90 |  |
| 993 | 100 |  |
| 909 | 100 |  |
| 1040 | 100 |  |
| 964 | 100 |  |
| 868 | 100 | ***** |
| 1066 | 100 |  |
| *Lithothamnion* cf. *proliferum* | 932 | 28.57142857 | ***** |
| 891 | 30 |  |
| 1060 | 50 |  |
| 949 | 54.54545455 |  |
| 958 | 60 |  |
| 1009 | 60 | ***** |
| 1037 | 60 | ***** |
| 989 | 80 | ***** |
| 991 | 88.88888889 |  |
| 1071 | 88.88888889 |  |
| 924 | 90 |  |
| 888 | 100 | ***** |
| *Lithophyllum* cf. *pygmaeum* | 988 | 70 | ***** |
| 981 | 70 |  |
| 965 | 80 |  |
| 1076 | 80 |  |
| 1051 | 88.88888889 | ***** |
| 985 | 90 |  |
| 1058 | 90 | ***** |
| 889 | 90 | ***** |
| 997 | 100 |  |
| 996 | 100 |  |
| 1013 | 100 |  |
| 1077 | 100 | ***** |
| *Melyvonnea* cf. *madagascariensis* | 944 | 0 | ***** |
| 873 | 10 |  |
| 978 | 12.5 |  |
| 907 | 20 |  |
| 942 | 30 | ***** |
| 930 | 30 | ***** |
| 966 | 40 | ***** |
| 972 | 70 |  |
| 871 | 77.77777778 |  |
| 954 | 77.77777778 |  |
| 1005 | 90 |  |
| 948 | 90.90909091 | ***** |
| *Neogoniolithon* cf. *fosliei* | 928 | 0 | ***** |
| 941 | 10 |  |
| 1043 | 20 |  |
| 893 | 40 |  |
| 971 | 66.66666667 | ***** |
| 976 | 70 | ***** |
| 1011 | 70 | ***** |
| 918 | 70 |  |
| 906 | 80 |  |
| 1067 | 88.88888889 |  |
| 987 | 90 | ***** |
| 917 | 90 |  |
| *Porolithon onkodes* | 1023 | 40 | ***** |
| 1003 | 40 |  |
| 957 | 60 |  |
| 995 | 60 |  |
| 1018 | 90 | ***** |
| 1073 | 90 | ***** |
| 929 | 90 | ***** |
| 952 | 100 |  |
| 1021 | 100 |  |
| 1008 | 100 | ***** |
| 1010 | 100 |  |
| 998 | 100 |  |
| *Porolithon* sp.1 | 933 | 60 | ***** |
| 905 | 70 |  |
| 887 | 80 |  |
| 1006 | 90 | ***** |
| 1030 | 90 |  |
| 915 | 90 | ***** |
| 900 | 90 |  |
| 1063 | 90 | ***** |
| 1034 | 90 |  |
| 875 | 100 |  |
| 1016 | 100 | ***** |
| 1002 | 100 |  |
| *Porolithon* sp.2 | 881 | 60 | ***** |
| 946 | 70 |  |
| 1070 | 80 |  |
| 910 | 80 |  |
| 1079 | 87.5 | ***** |
| 1027 | 88.88888889 | ***** |
| 1047 | 90 | ***** |
| 883 | 90 |  |
| 1014 | 90 |  |
| 892 | 90 |  |
| 984 | 100 |  |
| 921 | 100 | ***** |
| *Ramicrusta* sp. | 1039 | 40 | ***** |
| 999 | 50 |  |
| 904 | 60 |  |
| 1061 | 60 |  |
| 927 | 66.66666667 | ***** |
| 1042 | 70 | ***** |
| 947 | 77.77777778 | ***** |
| 986 | 80 |  |
| 963 | 80 |  |
| 926 | 80 |  |
| 970 | 80 |  |
| 908 | 90 | ***** |
| *Sporolithon* sp. | 1017 | 20 | ***** |
| 980 | 50 |  |
| 885 | 50 |  |
| 953 | 60 |  |
| 936 | 80 | ***** |
| 897 | 80 | ***** |
| 1029 | 87.5 | ***** |
| 1007 | 88.88888889 |  |
| 934 | 90 |  |
| 886 | 90 |  |
| 1038 | 90 |  |
| 877 | 100 | ***** |
| *Titanoderma* cf. *tessellatum* | 1035 | 81.81818182 | ***** |
| 920 | 90 |  |
| 983 | 90 | ***** |
| 931 | 90 | ***** |
| 890 | 100 | ***** |
| 994 | 100 |  |
| 903 | 100 |  |
| 937 | 100 |  |
| 880 | 100 |  |
| 1080 | 100 |  |
| 990 | 100 |  |
| 895 | 100 | ***** |
| *Coelastrea aspera* | *Adeylithon* cf. *bosencei* | 1610 | 0 | ***** |
| 1558 | 0 |  |
| 1595 | 50 | ***** |
| 1581 | 50 | ***** |
| 1528 | 57.14285714 | ***** |
| 1557 | 100 | ***** |
| *Amphiroa* cf. *foliacea* | 1550 | 0 | ***** |
| 1563 | 0 | ***** |
| 1607 | 0 | ***** |
| 1535 | 0 | ***** |
| 1530 | 0 |  |
| 1560 | 0 | ***** |
| Aragonite tile | 1589 | 0 |  |
| 1527 | 0 |  |
| 1566 | 0 | ***** |
| 1539 | 0 |  |
| 1591 | 0 |  |
| 1546 | 0 |  |
| *Hydorlithon* cf. *reinboldii* | 1602 | 0 |  |
| 1592 | 0 | ***** |
| 1549 | 0 |  |
| 1554 | 0 |  |
| 1564 | 0 | ***** |
| 1603 | 20 | ***** |
| *Lithophyllum* cf. *insipidium* | 1531 | 50 | ***** |
| 1548 | 70 | ***** |
| 1561 | 70 | ***** |
| 1545 | 77.77777778 | ***** |
| 1590 | 80 |  |
| 1519 | 88.88888889 | ***** |
| *Lithophyllum* cf. *kotschyanum* | 1615 | 10 | ***** |
| 1582 | 10 |  |
| 1598 | 16.66666667 | ***** |
| 1576 | 20 | ***** |
| 1569 | 30 | ***** |
| 1620 | 77.77777778 | ***** |
| *Lithothamnion* cf*. proliferum* | 1547 | 0 | ***** |
| 1571 | 0 | ***** |
| 1526 | 0 | ***** |
| 1551 | 0 |  |
| 1572 | 0 | ***** |
| 1514 | 10 | ***** |
| *Lithophyllum* cf*. pygmaeum* | 1536 | 0 | ***** |
| 1580 | 0 |  |
| 1594 | 0 | ***** |
| 1587 | 0 | ***** |
| 1516 | 0 | ***** |
| 1574 | 0 | ***** |
| *Melyvonnea* cf*. madagascariensis* | 1609 | 0 | ***** |
| 1573 | 0 |  |
| 1524 | 0 | ***** |
| 1611 | 0 | ***** |
| 1597 | 10 | ***** |
| 1584 | 77.77777778 | ***** |
| *Neogoniolithon* cf. *fosliei* | 1521 | 0 | ***** |
| 1583 | 30 | ***** |
| 1585 | 50 | ***** |
| 1555 | 77.77777778 | ***** |
| 1588 | 90 |  |
| 1553 | 90 | ***** |
| *Porolithon onkodes* | 1605 | 0 | ***** |
| 1522 | 0 |  |
| 1534 | 0 | ***** |
| 1619 | 0 | ***** |
| 1596 | 0 | ***** |
| 1575 | 0 | ***** |
| *Porolithon* sp.1 | 1567 | 0 | ***** |
| 1529 | 0 | ***** |
| 1543 | 0 | ***** |
| 1544 | 0 |  |
| 1578 | 0 | ***** |
| 1518 | 40 | ***** |
| *Porolithon* sp.2 | 1533 | 0 | ***** |
| 1614 | 0 |  |
| 1537 | 0 | ***** |
| 1577 | 11.11111111 | ***** |
| 1601 | 40 | ***** |
| 1513 | 75 | ***** |
| *Ramicrusta* sp. | 1579 | 0 | ***** |
| 1525 | 0 | ***** |
| 1608 | 0 | ***** |
| 1570 | 0 |  |
| 1559 | 0 | ***** |
| 1540 | 20 | ***** |
| *Sporolithon* sp. | 1523 | 0 | ***** |
| 1517 | 0 | ***** |
| 1515 | 0 | ***** |
| 1538 | 20 | ***** |
| 1613 | 70 |  |
| 1599 | 90 | ***** |
| *Titanoderma* cf. *tessellatum* | 1552 | 30 | ***** |
| 1618 | 40 | **trial** |
| 1616 | 50 | ***** |
| 1617 | 50 | ***** |
| 1565 | 70 |  |
| 1562 | 80 | **trial** |
| *Caulastrea furcata* | *Adeylithon* cf*. bosencei* | 2212 | 90 | ***** |
| 2163 | 100 | ***** |
| 2179 | 100 | ***** |
| *Amphiroa* cf. *foliacea* | 2196 | 0 | ***** |
| 2201 | 0 | ***** |
| 2213 | 20 | ***** |
| Aragonite tile | 2199 | 0 |  |
| 2162 | 0 | ***** |
| 2180 | 20 |  |
| *Hydorlithon* cf. *reinboldii* | 2167 | 90 | ***** |
| 2161 | 90 | ***** |
| 2192 | 100 | ***** |
| *Lithophyllum* cf. *insipidium* | 2166 | 30 | ***** |
| 2181 | 70 | ***** |
| 2194 | 100 | ***** |
| *Lithophyllum* cf*. kotschyanum* | 2214 | 80 | ***** |
| 2168 | 100 | ***** |
| 2211 | 100 | ***** |
| *Lithothamnion* cf. *proliferum* | 2208 | 0 | ***** |
| 2206 | 90 | ***** |
| 2164 | 100 | ***** |
| *Lithophyllum* cf. *pygmaeum* | 2193 | 70 | ***** |
| 2190 | 70 | ***** |
| 2173 | 90 | ***** |
| *Melyvonnea* cf. *madagascariensis* | 2202 | 90 | ***** |
| 2197 | 100 | ***** |
| 2174 | 100 | ***** |
| *Neogoniolithon* cf. *fosliei* | 2205 | 100 | ***** |
| 2200 | 100 | ***** |
| 2187 | 100 | ***** |
| *Porolithon onkodes* | 2198 | 10 | ***** |
| 2172 | 20 | ***** |
| 2178 | 100 | ***** |
| *Porolithon* sp.1 | 2165 | 18.18181818 | ***** |
| 2185 | 70 | ***** |
| 2175 | 88.88888889 | ***** |
| *Porolithon* sp.2 | 2195 | 72.72727273 | ***** |
| 2209 | 88.88888889 | ***** |
| 2184 | 100 | ***** |
| *Ramicrusta* sp. | 2182 | 100 | ***** |
| 2188 | 100 | ***** |
| 2183 | 100 | ***** |
| *Sporolithon* sp. | 2171 | 90 | ***** |
| 2176 | 100 | ***** |
| 2207 | 100 | ***** |
| *Titanoderma* cf. *tessellatum* | 2204 | 88.88888889 | ***** |
| 2177 | 100 | ***** |
| 2191 | 100 | ***** |
| *Dispastrea favus* | *Adeylithon* cf. *bosencei* | 344 | 50 |  |
| 309 | 50 | ***** |
| 295 | 60 |  |
| 405 | 60 |  |
| 237 | 66.66666667 | ***** |
| 340 | 70 |  |
| 412 | 72.72727273 | ***** |
| 350 | 81.81818182 | ***** |
| 419 | 81.81818182 |  |
| 233 | 85.71428571 |  |
| 377 | 88.88888889 |  |
| 383 | 90 | ***** |
| *Amphiroa* cf. *foliacea* | 363 | 0 |  |
| 361 | 0 | ***** |
| 260 | 0 |  |
| 397 | 0 | ***** |
| 330 | 0 |  |
| 358 | 0 |  |
| 401 | 0 |  |
| 242 | 0 |  |
| 331 | 0 |  |
| 395 | 10 | ***** |
| 381 | 10 | ***** |
| 399 | 12.5 | ***** |
| Aragonite tile | 220 | 0 |  |
| 225 | 0 |  |
| 320 | 0 |  |
| 418 | 0 |  |
| 266 | 0 |  |
| 265 | 0 |  |
| 353 | 0 | ***** |
| 298 | 0 |  |
| 251 | 0 |  |
| 318 | 0 |  |
| 267 | 0 |  |
| 385 | 11.11111111 |  |
| *Hydorlithon* cf. *reinboldii* | 375 | 0 | ***** |
| 259 | 11.11111111 |  |
| 347 | 50 |  |
| 368 | 66.66666667 |  |
| 345 | 77.77777778 | ***** |
| 394 | 80 |  |
| 219 | 80 | ***** |
| 370 | 80 |  |
| 272 | 80 | ***** |
| 262 | 88.88888889 |  |
| 274 | 90 |  |
| 391 | 90 | ***** |
| *Lithophyllum* cf. *insipidium* | 369 | 20 | ***** |
| 218 | 27.27272727 |  |
| 299 | 27.27272727 |  |
| 352 | 27.27272727 |  |
| 284 | 30 | ***** |
| 307 | 40 | ***** |
| 351 | 40 |  |
| 292 | 50 |  |
| 294 | 50 | ***** |
| 338 | 72.72727273 |  |
| 355 | 88.88888889 |  |
| 372 | 100 | ***** |
| *Lithophyllum* cf. *kotschyanum* | 376 | 10 | ***** |
| 413 | 60 |  |
| 359 | 60 |  |
| 366 | 62.5 |  |
| 268 | 66.66666667 | ***** |
| 280 | 70 | ***** |
| 390 | 70 |  |
| 288 | 77.77777778 | ***** |
| 247 | 87.5 |  |
| 253 | 87.5 |  |
| 310 | 90 |  |
| 287 | 100 | ***** |
| *Lithothamnion* cf. *proliferum* | 277 | 0 | ***** |
| 396 | 10 |  |
| 402 | 11.11111111 |  |
| 323 | 20 |  |
| 422 | 33.33333333 |  |
| 258 | 36.36363636 | ***** |
| 241 | 40 | ***** |
| 371 | 40 | ***** |
| 424 | 50 |  |
| 221 | 50 |  |
| 356 | 88.88888889 |  |
| 329 | 100 | ***** |
| *Lithophyllum* cf. *pygmaeum* | 425 | 0 | ***** |
| 263 | 10 |  |
| 387 | 10 |  |
| 333 | 20 |  |
| 232 | 22.22222222 | ***** |
| 337 | 30 | ***** |
| 398 | 40 | ***** |
| 230 | 50 |  |
| 408 | 50 |  |
| 348 | 50 |  |
| 286 | 60 |  |
| 293 | 75 | ***** |
| *Melyvonnea* cf. *madagascariensis* | 254 | 66.66666667 |  |
| 423 | 66.66666667 | ***** |
| 336 | 71.42857143 |  |
| 226 | 71.42857143 |  |
| 429 | 72.72727273 | ***** |
| 306 | 77.77777778 | ***** |
| 231 | 80 | ***** |
| 313 | 85.71428571 |  |
| 384 | 88.88888889 |  |
| 315 | 100 |  |
| 417 | 100 |  |
| 317 | 100 | ***** |
| *Neogoniolithon* cf. *fosliei* | 246 | 0 |  |
| 248 | 0 | ***** |
| 342 | 10 |  |
| 319 | 30 |  |
| 223 | 33.33333333 | ***** |
| 235 | 40 | ***** |
| 325 | 40 | ***** |
| 300 | 60 |  |
| 289 | 71.42857143 |  |
| 432 | 80 |  |
| 415 | 90 | ***** |
| 334 | 100 |  |
| *Porolithon onkodes* | 227 | 0 | ***** |
| 273 | 0 |  |
| 339 | 0 | ***** |
| 217 | 0 |  |
| 240 | 0 |  |
| 360 | 0 |  |
| 392 | 0 |  |
| 244 | 0 |  |
| 228 | 0 |  |
| 278 | 18.18181818 | ***** |
| 407 | 88.88888889 | ***** |
| 279 | 100 | ***** |
| *Porolithon* sp.1 | 341 | 0 | ***** |
| 316 | 0 |  |
| 301 | 10 |  |
| 281 | 18.18181818 |  |
| 321 | 20 |  |
| 332 | 20 | ***** |
| 256 | 30 | ***** |
| 326 | 40 | ***** |
| 349 | 60 |  |
| 343 | 80 |  |
| 373 | 90 | ***** |
| 304 | 90 |  |
| *Porolithon* sp.2 | 291 | 0 | ***** |
| 303 | 40 |  |
| 354 | 54.54545455 |  |
| 427 | 58.33333333 |  |
| 308 | 66.66666667 | ***** |
| 346 | 70 |  |
| 249 | 70 | ***** |
| 234 | 72.72727273 | ***** |
| 414 | 77.77777778 |  |
| 403 | 80 |  |
| 386 | 100 |  |
| 393 | 100 | ***** |
| *Ramicrusta* sp. | 410 | 18.18181818 | ***** |
| 229 | 22.22222222 |  |
| 269 | 22.22222222 |  |
| 416 | 36.36363636 |  |
| 400 | 40 | ***** |
| 245 | 50 | ***** |
| 264 | 50 | ***** |
| 290 | 70 |  |
| 224 | 77.77777778 |  |
| 367 | 85.71428571 |  |
| 302 | 90 |  |
| 239 | 100 | ***** |
| *Sporolithon* sp. | 282 | 0 | ***** |
| 296 | 0 |  |
| 261 | 11.11111111 |  |
| 252 | 40 | ***** |
| 311 | 40 |  |
| 431 | 45.45454545 | ***** |
| 250 | 66.66666667 | ***** |
| 382 | 66.66666667 |  |
| 389 | 72.72727273 |  |
| 379 | 80 |  |
| 428 | 90 |  |
| 238 | 100 | ***** |
| *Titanoderma* cf. *tessellatum* | 324 | 40 | ***** |
| 257 | 45.45454545 |  |
| 255 | 50 |  |
| 365 | 70 |  |
| 283 | 75 | ***** |
| 409 | 80 | ***** |
| 312 | 90 | ***** |
| 406 | 100 |  |
| 297 | 100 |  |
| 421 | 100 |  |
| 322 | 100 | ***** |
| 270 | 100 |  |
| *Echinophyllia aspera* | *Adeylithon* cf. *bosencei* | 1776 | 44.44444444 | ***** |
| 1758 | 50 |  |
| 1740 | 60 |  |
| 1804 | 75 | ***** |
| 1830 | 80 | ***** |
| 1759 | 80 |  |
| 1765 | 80 | ***** |
| 1622 | 80 |  |
| 1766 | 100 |  |
| 1680 | 100 |  |
| 1744 | 100 | ***** |
| 1820 | 100 |  |
| *Amphiroa* cf. *foliacea* | 1816 | 0 | ***** |
| 1662 | 0 |  |
| 1649 | 0 | ***** |
| 1712 | 0 |  |
| 1797 | 0 |  |
| 1818 | 0 |  |
| 1672 | 0 | ***** |
| 1746 | 0 | ***** |
| 1637 | 0 |  |
| 1699 | 0 | ***** |
| 1729 | 0 |  |
| 1686 | 40 |  |
| Aragonite tile | 1657 | 0 |  |
| 1641 | 0 |  |
| 1713 | 0 |  |
| 1779 | 0 |  |
| 1822 | 0 |  |
| 1669 | 0 |  |
| 1633 | 0 |  |
| 1742 | 0 |  |
| 1714 | 0 | ***** |
| 1813 | 0 |  |
| 1650 | 0 |  |
| 1697 | 10 |  |
| *Hydorlithon* cf. *reinboldii* | 1624 | 22.22222222 | ***** |
| 1715 | 30 |  |
| 1671 | 44.44444444 |  |
| 1639 | 66.66666667 | ***** |
| 1773 | 70 | ***** |
| 1775 | 70 |  |
| 1681 | 70 | ***** |
| 1629 | 70 |  |
| 1718 | 80 |  |
| 1648 | 80 |  |
| 1730 | 80 |  |
| 1720 | 88.88888889 | ***** |
| *Lithophyllum* cf. *insipidium* | 1679 | 44.44444444 | ***** |
| 1685 | 50 |  |
| 1647 | 60 |  |
| 1800 | 80 | ***** |
| 1770 | 80 |  |
| 1670 | 81.81818182 | ***** |
| 1655 | 87.5 | ***** |
| 1827 | 90 |  |
| 1787 | 90 |  |
| 1653 | 90 |  |
| 1676 | 90 |  |
| 1806 | 100 | ***** |
| *Lithophyllum* cf. *kotschyanum* | 1661 | 40 | ***** |
| 1724 | 40 |  |
| 1754 | 60 |  |
| 1821 | 66.66666667 |  |
| 1789 | 70 | ***** |
| 1788 | 77.77777778 | ***** |
| 1731 | 80 | ***** |
| 1645 | 100 |  |
| 1780 | 100 |  |
| 1733 | 100 |  |
| 1764 | 100 | ***** |
| 1737 | 100 |  |
| *Lithothamnion* cf. *proliferum* | 1801 | 0 | ***** |
| 1760 | 40 |  |
| 1834 | 40 |  |
| 1703 | 40 |  |
| 1644 | 50 | ***** |
| 1652 | 50 | ***** |
| 1803 | 57.14285714 | ***** |
| 1708 | 80 |  |
| 1747 | 80 |  |
| 1684 | 90 |  |
| 1658 | 90 |  |
| 1632 | 100 | ***** |
| *Lithophyllum* cf. *pygmaeum* | 1704 | 0 | ***** |
| 1719 | 10 |  |
| 1709 | 27.27272727 |  |
| 1689 | 30 | ***** |
| 1743 | 30 |  |
| 1796 | 40 | ***** |
| 1710 | 55.55555556 | ***** |
| 1774 | 60 |  |
| 1793 | 60 |  |
| 1805 | 60 |  |
| 1763 | 80 |  |
| 1809 | 100 | ***** |
| *Melyvonnea* cf. *madagascariensis* | 1656 | 30 | ***** |
| 1636 | 54.54545455 |  |
| 1706 | 55.55555556 |  |
| 1814 | 62.5 |  |
| 1828 | 66.66666667 | ***** |
| 1790 | 70 | ***** |
| 1792 | 70 | ***** |
| 1761 | 77.77777778 |  |
| 1823 | 87.5 |  |
| 1631 | 88.88888889 |  |
| 1707 | 100 | ***** |
| 1691 | 100 |  |
| *Neogoniolithon* cf. *fosliei* | 1682 | 0 |  |
| 1771 | 0 |  |
| 1726 | 0 | ***** |
| 1825 | 0 |  |
| 1665 | 30 |  |
| 1692 | 70 | ***** |
| 1832 | 70 | ***** |
| 1798 | 70 | ***** |
| 1836 | 80 |  |
| 1667 | 88.88888889 |  |
| 1802 | 100 |  |
| 1791 | 100 | ***** |
| *Porolithon onkodes* | 1786 | 0 |  |
| 1829 | 0 | ***** |
| 1698 | 0 |  |
| 1651 | 0 |  |
| 1623 | 0 | ***** |
| 1721 | 0 |  |
| 1635 | 0 | ***** |
| 1701 | 0 |  |
| 1690 | 0 | ***** |
| 1833 | 80 |  |
| 1783 | 90 |  |
| 1769 | 100 | ***** |
| *Porolithon* sp.1 | 1677 | 20 | ***** |
| 1675 | 50 |  |
| 1819 | 70 |  |
| 1748 | 80 | ***** |
| 1646 | 80 | ***** |
| 1625 | 90 |  |
| 1687 | 90 | ***** |
| 1642 | 90 |  |
| 1817 | 90 |  |
| 1621 | 100 |  |
| 1688 | 100 |  |
| 1678 | 100 | ***** |
| *Porolithon* sp.2 | 1627 | 10 | ***** |
| 1628 | 33.33333333 |  |
| 1711 | 40 |  |
| 1767 | 55.55555556 |  |
| 1716 | 60 | ***** |
| 1668 | 66.66666667 | ***** |
| 1782 | 70 | ***** |
| 1666 | 80 |  |
| 1794 | 80 |  |
| 1812 | 80 |  |
| 1674 | 87.5 |  |
| 1750 | 90 | ***** |
| *Ramicrusta* sp. | 1640 | 60 | ***** |
| 1736 | 66.66666667 |  |
| 1734 | 77.77777778 |  |
| 1693 | 80 |  |
| 1762 | 88.88888889 | ***** |
| 1732 | 88.88888889 | ***** |
| 1751 | 90 |  |
| 1738 | 90 |  |
| 1663 | 90 | ***** |
| 1795 | 90 |  |
| 1815 | 100 |  |
| 1660 | 100 | ***** |
| *Sporolithon* sp. | 1741 | 40 | ***** |
| 1749 | 66.66666667 |  |
| 1643 | 70 |  |
| 1831 | 80 | ***** |
| 1634 | 90 | ***** |
| 1694 | 90 | ***** |
| 1739 | 100 |  |
| 1630 | 100 |  |
| 1781 | 100 |  |
| 1728 | 100 |  |
| 1824 | 100 | ***** |
| 1784 | 100 |  |
| *Titanoderma* cf. *tessellatum* | 1725 | 11.11111111 | ***** |
| 1700 | 60 |  |
| 1756 | 70 |  |
| 1777 | 77.77777778 |  |
| 1654 | 88.88888889 | ***** |
| 1659 | 90 |  |
| 1695 | 90 | ***** |
| 1768 | 90 |  |
| 1807 | 90 | ***** |
| 1696 | 100 |  |
| 1722 | 100 |  |
| 1664 | 100 | ***** |
| *Fungia fungites* | *Adeylithon* cf. *bosencei* | 2887 | 0 |  |
| 3020 | 0 |  |
| 2886 | 0 | ***** |
| 3035 | 0 |  |
| 2974 | 0 |  |
| 2873 | 0 | ***** |
| 3047 | 0 |  |
| 2931 | 0 |  |
| 3004 | 10 | ***** |
| 2934 | 18.18181818 | ***** |
| 3007 | 22.22222222 |  |
| 3013 | 66.66666667 | ***** |
| *Amphiroa* cf. *foliacea* | 2921 | 0 |  |
| 2937 | 0 | ***** |
| 3056 | 0 |  |
| 2996 | 0 | ***** |
| 2876 | 0 |  |
| 2871 | 0 |  |
| 3017 | 0 | ***** |
| 3041 | 0 |  |
| 2939 | 0 |  |
| 3027 | 0 | ***** |
| 3011 | 0 | ***** |
| 2993 | 0 |  |
| Aragonite tile | 3040 | 0 |  |
| 2889 | 0 |  |
| 3024 | 0 |  |
| 3009 | 0 |  |
| 3059 | 0 |  |
| 2917 | 0 |  |
| 2951 | 0 | ***** |
| 2892 | 0 |  |
| 3058 | 0 |  |
| 2888 | 0 |  |
| 2990 | 0 |  |
| 2919 | 0 |  |
| *Hydorlithon* cf. *reinboldii* | 3063 | 0 |  |
| 3065 | 0 |  |
| 2906 | 0 | ***** |
| 3077 | 0 | ***** |
| 2979 | 0 | ***** |
| 2865 | 0 |  |
| 2935 | 0 | ***** |
| 2902 | 0 |  |
| 2905 | 0 |  |
| 2881 | 0 |  |
| 2874 | 10 |  |
| 2897 | 11.11111111 | ***** |
| *Lithophyllum* cf. *insipidium* | 3026 | 0 |  |
| 2866 | 0 | ***** |
| 2907 | 0 | ***** |
| 2950 | 0 |  |
| 2962 | 0 | ***** |
| 3028 | 0 |  |
| 2978 | 0 |  |
| 2953 | 0 | ***** |
| 3053 | 0 |  |
| 3037 | 0 |  |
| 3033 | 10 |  |
| 2901 | 11.11111111 | ***** |
| *Lithophyllum* cf. *kotschyanum* | 2952 | 0 |  |
| 2896 | 0 |  |
| 2900 | 0 | ***** |
| 2903 | 0 |  |
| 3046 | 0 |  |
| 2981 | 10 | ***** |
| 3000 | 10 | ***** |
| 2954 | 14.28571429 | ***** |
| 2947 | 20 |  |
| 3006 | 20 |  |
| 2945 | 22.22222222 |  |
| 2977 | 37.5 | ***** |
| *Lithothamnion* cf. *proliferum* | 2938 | 0 |  |
| 3005 | 0 | ***** |
| 2924 | 0 |  |
| 2922 | 0 | ***** |
| 2933 | 0 |  |
| 2877 | 12.5 | ***** |
| 2958 | 12.5 | ***** |
| 2870 | 28.57142857 | ***** |
| 3069 | 33.33333333 |  |
| 2971 | 33.33333333 |  |
| 2890 | 37.5 |  |
| 2918 | 50 | ***** |
| *Lithophyllum* cf. *pygmaeum* | 3029 | 0 |  |
| 2925 | 0 | ***** |
| 3045 | 0 |  |
| 2908 | 0 | ***** |
| 3003 | 0 | ***** |
| 2966 | 0 |  |
| 2956 | 0 | ***** |
| 3030 | 0 |  |
| 3051 | 0 |  |
| 2985 | 0 |  |
| 3064 | 0 | ***** |
| 2999 | 30 |  |
| *Melyvonnea* cf. *madagascariensis* | 3068 | 0 |  |
| 2986 | 0 | ***** |
| 3078 | 0 |  |
| 2927 | 10 |  |
| 2911 | 12.5 | ***** |
| 3050 | 20 | ***** |
| 2885 | 30 | ***** |
| 3072 | 33.33333333 | ***** |
| 2899 | 37.5 |  |
| 3032 | 37.5 |  |
| 2875 | 50 |  |
| 2948 | 62.5 | ***** |
| *Neogoniolithon* cf. *fosliei* | 2943 | 0 |  |
| 2984 | 0 | ***** |
| 3031 | 0 |  |
| 2869 | 0 |  |
| 2920 | 0 |  |
| 3008 | 0 |  |
| 3052 | 0 |  |
| 3049 | 0 | ***** |
| 2879 | 0 |  |
| 3001 | 14.28571429 | ***** |
| 2969 | 36.36363636 | ***** |
| 2976 | 70 | ***** |
| *Porolithon onkodes* | 3010 | 0 | ***** |
| 2868 | 0 | ***** |
| 3042 | 0 |  |
| 2895 | 0 |  |
| 2989 | 0 | ***** |
| 2946 | 0 |  |
| 3067 | 0 |  |
| 2987 | 0 |  |
| 2988 | 0 | ***** |
| 2963 | 0 |  |
| 2914 | 14.28571429 | ***** |
| 2872 | 42.85714286 |  |
| *Porolithon* sp.1 | 2932 | 0 |  |
| 2915 | 0 | ***** |
| 3057 | 0 |  |
| 2940 | 0 |  |
| 3014 | 0 |  |
| 2970 | 0 | ***** |
| 2983 | 0 |  |
| 2913 | 0 | ***** |
| 3012 | 16.66666667 | ***** |
| 2942 | 16.66666667 |  |
| 2904 | 20 |  |
| 2949 | 20 | ***** |
| *Porolithon* sp.2 | 3055 | 0 |  |
| 2961 | 0 |  |
| 2972 | 0 |  |
| 2964 | 0 | ***** |
| 2912 | 0 | ***** |
| 3073 | 0 |  |
| 2898 | 0 | ***** |
| 2891 | 0 |  |
| 2941 | 0 | ***** |
| 2975 | 0 | ***** |
| 3070 | 0 |  |
| 3074 | 37.5 |  |
| *Ramicrusta* sp. | 2910 | 0 |  |
| 3025 | 0 |  |
| 3044 | 0 | ***** |
| 3054 | 0 |  |
| 2923 | 0 |  |
| 2967 | 12.5 | **~~*~~** |
| 2883 | 14.28571429 | ***** |
| 2878 | 20 | **~~*~~** |
| 2980 | 25 | ***** |
| 3048 | 50 | ***** |
| 2957 | 62.5 |  |
| 2994 | 100 | ***** |
| *Sporolithon* sp. | 3002 | 0 |  |
| 2884 | 0 |  |
| 3060 | 0 | ***** |
| 2959 | 0 |  |
| 3016 | 14.28571429 |  |
| 2916 | 14.28571429 |  |
| 2998 | 33.33333333 | ***** |
| 2864 | 37.5 | ***** |
| 3043 | 57.14285714 | ***** |
| 3066 | 62.5 |  |
| 2926 | 80 |  |
| 2882 | 80 | ***** |
| *Titanoderma* cf. *tessellatum* | 2936 | 0 |  |
| 2955 | 0 |  |
| 3075 | 0 | ***** |
| 3021 | 0 |  |
| 3062 | 0 |  |
| 2909 | 0 | ***** |
| 2960 | 0 |  |
| 2928 | 0 |  |
| 2863 | 20 | ***** |
| 2867 | 30 | ***** |
| 3039 | 37.5 |  |
| 3061 | 77.77777778 | ***** |
| *Goniastrea favulus* | *Adeylithon* cf. *bosencei* | 1377 | 0 | ***** |
| 1416 | 20 |  |
| 1367 | 22.22222222 |  |
| 1472 | 22.22222222 |  |
| 1308 | 33.33333333 | ***** |
| 1395 | 40 | ***** |
| 1464 | 60 | ***** |
| 1372 | 66.66666667 |  |
| 1438 | 80 |  |
| 1423 | 80 |  |
| 1435 | 87.5 |  |
| 1502 | 90 | ***** |
| *Amphiroa* cf. *foliacea* | 1471 | 0 |  |
| 1305 | 0 |  |
| 1425 | 0 | ***** |
| 1500 | 0 |  |
| 1344 | 0 | ***** |
| 1387 | 0 |  |
| 1373 | 0 |  |
| 1314 | 0 | ***** |
| 1484 | 0 | ***** |
| 1508 | 0 |  |
| 1360 | 0 |  |
| 1363 | 0 | ***** |
| Aragonite tile | 1300 | 0 |  |
| 1304 | 0 |  |
| 1391 | 0 |  |
| 1331 | 0 |  |
| 1469 | 0 | ***** |
| 1505 | 0 |  |
| 1399 | 0 |  |
| 1323 | 0 |  |
| 1487 | 0 |  |
| 1454 | 0 |  |
| 1421 | 0 |  |
| 1434 | 0 |  |
| *Hydorlithon* cf. *reinboldii* | 1307 | 0 | ***** |
| 1333 | 0 |  |
| 1378 | 11.11111111 |  |
| 1402 | 11.11111111 |  |
| 1475 | 12.5 |  |
| 1417 | 20 | ***** |
| 1322 | 30 | ***** |
| 1392 | 50 | ***** |
| 1368 | 50 |  |
| 1512 | 50 |  |
| 1501 | 50 |  |
| 1343 | 55.55555556 | ***** |
| *Lithophyllum* cf. *insipidium* | 1299 | 12.5 | ***** |
| 1353 | 30 |  |
| 1342 | 30 |  |
| 1415 | 40 |  |
| 1455 | 50 |  |
| 1429 | 50 | ***** |
| 1316 | 60 | ***** |
| 1498 | 60 |  |
| 1347 | 62.5 | ***** |
| 1388 | 66.66666667 |  |
| 1482 | 70 |  |
| 1329 | 71.42857143 | ***** |
| *Lithophyllum* cf. *kotschyanum* | 1488 | 0 | ***** |
| 1459 | 50 |  |
| 1359 | 50 |  |
| 1369 | 50 |  |
| 1414 | 55.55555556 |  |
| 1375 | 66.66666667 | ***** |
| 1462 | 75 | ***** |
| 1418 | 80 | ***** |
| 1403 | 100 |  |
| 1511 | 100 |  |
| 1351 | 100 |  |
| 1422 | 100 | ***** |
| *Lithothamnion* cf. *proliferum* | 1441 | 0 |  |
| 1306 | 11.11111111 | ***** |
| 1466 | 20 |  |
| 1349 | 25 |  |
| 1442 | 30 |  |
| 1327 | 33.33333333 | ***** |
| 1412 | 40 | ***** |
| 1460 | 50 | ***** |
| 1311 | 50 |  |
| 1340 | 71.42857143 |  |
| 1407 | 88.88888889 |  |
| 1352 | 100 | ***** |
| *Lithophyllum* cf. *pygmaeum* | 1483 | 0 |  |
| 1401 | 0 |  |
| 1448 | 0 | ***** |
| 1390 | 0 |  |
| 1468 | 0 |  |
| 1465 | 0 | ***** |
| 1335 | 0 |  |
| 1447 | 0 |  |
| 1426 | 0 |  |
| 1394 | 10 | ***** |
| 1491 | 10 | ***** |
| 1301 | 20 | ***** |
| *Melyvonnea* cf. *madagascariensis* | 1405 | 14.28571429 | ***** |
| 1467 | 22.22222222 |  |
| 1439 | 25 |  |
| 1385 | 25 |  |
| 1318 | 30 |  |
| 1370 | 33.33333333 | ***** |
| 1303 | 33.33333333 | ***** |
| 1330 | 50 | ***** |
| 1480 | 55.55555556 |  |
| 1419 | 66.66666667 |  |
| 1509 | 88.88888889 |  |
| 1437 | 100 | ***** |
| *Neogoniolithon* cf. *fosliei* | 1366 | 11.11111111 | ***** |
| 1444 | 20 |  |
| 1315 | 30 |  |
| 1334 | 37.5 |  |
| 1477 | 44.44444444 |  |
| 1409 | 44.44444444 | ***** |
| 1312 | 50 |  |
| 1341 | 50 | ***** |
| 1309 | 60 | ***** |
| 1450 | 60 |  |
| 1411 | 70 |  |
| 1496 | 80 | ***** |
| *Porolithon onkodes* | 1397 | 0 | ***** |
| 1499 | 0 |  |
| 1358 | 0 |  |
| 1420 | 0 | ***** |
| 1396 | 0 |  |
| 1404 | 0 |  |
| 1321 | 0 | ***** |
| 1497 | 0 |  |
| 1449 | 0 | ***** |
| 1486 | 20 |  |
| 1379 | 20 |  |
| 1503 | 50 | ***** |
| *Porolithon* sp.1 | 1393 | 0 |  |
| 1457 | 0 | ***** |
| 1297 | 0 |  |
| 1446 | 10 |  |
| 1332 | 11.11111111 |  |
| 1443 | 20 | ***** |
| 1355 | 20 | ***** |
| 1320 | 40 | ***** |
| 1504 | 40 |  |
| 1492 | 60 |  |
| 1362 | 60 |  |
| 1350 | 80 | ***** |
| *Porolithon* sp.2 | 1445 | 0 | ***** |
| 1298 | 10 |  |
| 1410 | 10 |  |
| 1433 | 10 |  |
| 1431 | 30 |  |
| 1452 | 40 | ***** |
| 1310 | 40 | ***** |
| 1453 | 50 | ***** |
| 1326 | 60 |  |
| 1339 | 66.66666667 |  |
| 1510 | 75 |  |
| 1476 | 80 | ***** |
| *Ramicrusta* sp. | 1506 | 0 |  |
| 1456 | 0 | ***** |
| 1348 | 20 |  |
| 1440 | 22.22222222 |  |
| 1325 | 60 |  |
| 1313 | 60 | ***** |
| 1507 | 70 | ***** |
| 1381 | 75 | ***** |
| 1493 | 77.77777778 |  |
| 1361 | 80 |  |
| 1494 | 80 |  |
| 1380 | 90 | ***** |
| *Sporolithon* sp. | 1461 | 11.11111111 |  |
| 1485 | 11.11111111 | ***** |
| 1354 | 12.5 |  |
| 1324 | 20 |  |
| 1436 | 50 | ***** |
| 1336 | 60 | ***** |
| 1490 | 60 | ***** |
| 1356 | 70 | ***** |
| 1319 | 70 |  |
| 1427 | 70 |  |
| 1389 | 80 |  |
| 1386 | 88.88888889 | ***** |
| *Titanoderma* cf. *tessellatum* | 1382 | 55.55555556 | ***** |
| 1383 | 60 |  |
| 1473 | 62.5 |  |
| 1479 | 70 |  |
| 1374 | 71.42857143 | ***** |
| 1428 | 77.77777778 |  |
| 1430 | 80 | ***** |
| 1481 | 80 |  |
| 1478 | 85.71428571 | ***** |
| 1400 | 88.88888889 |  |
| 1364 | 90 |  |
| 1413 | 100 | ***** |
| *Lobophyllia corymbosa* | *Adeylithon* cf. *bosencei* | 3197 | 10 | ***** |
| 3177 | 10 |  |
| 3229 | 10 |  |
| 3126 | 20 | ***** |
| 3167 | 20 |  |
| 3081 | 30 | ***** |
| 3193 | 40 | ***** |
| 3084 | 50 |  |
| 3226 | 60 |  |
| 3184 | 60 |  |
| 3164 | 60 |  |
| 3288 | 60 | ***** |
| *Amphiroa* cf. *foliacea* | 3152 | 0 |  |
| 3091 | 0 |  |
| 3216 | 0 | ***** |
| 3172 | 0 |  |
| 3249 | 0 | ***** |
| 3237 | 0 |  |
| 3270 | 0 |  |
| 3138 | 10 | ***** |
| 3139 | 10 | ***** |
| 3234 | 10 |  |
| 3161 | 30 |  |
| 3141 | 30 | ***** |
| Aragonite tile | 3173 | 0 |  |
| 3204 | 0 |  |
| 3284 | 0 |  |
| 3154 | 0 | ***** |
| 3246 | 0 |  |
| 3203 | 0 |  |
| 3114 | 0 |  |
| 3130 | 0 |  |
| 3224 | 0 |  |
| 3180 | 0 |  |
| 3228 | 0 |  |
| 3264 | 0 |  |
| *Hydorlithon* cf. *reinboldii* | 3290 | 20 |  |
| 3265 | 20 | ***** |
| 3098 | 20 |  |
| 3123 | 30 |  |
| 3082 | 30 |  |
| 3239 | 60 | ***** |
| 3178 | 60 | ***** |
| 3220 | 66.66666667 | ***** |
| 3093 | 70 |  |
| 3294 | 70 |  |
| 3245 | 80 |  |
| 3281 | 90 | ***** |
| *Lithophyllum* cf. *insipidium* | 3200 | 20 |  |
| 3151 | 20 |  |
| 3100 | 20 | ***** |
| 3109 | 20 |  |
| 3136 | 30 |  |
| 3254 | 50 | ***** |
| 3134 | 60 | ***** |
| 3215 | 60 | ***** |
| 3227 | 70 |  |
| 3292 | 70 |  |
| 3181 | 80 |  |
| 3250 | 90 | ***** |
| *Lithophyllum* cf. *kotschyanum* | 3247 | 0 | ***** |
| 3221 | 10 |  |
| 3291 | 20 |  |
| 3268 | 20 |  |
| 3261 | 22.22222222 |  |
| 3097 | 40 | ***** |
| 3101 | 50 | ***** |
| 3117 | 50 | ***** |
| 3285 | 70 |  |
| 3199 | 81.81818182 |  |
| 3156 | 90 | ***** |
| 3105 | 90 |  |
| *Lithothamnion* cf. *proliferum* | 3198 | 0 |  |
| 3110 | 0 | ***** |
| 3217 | 10 |  |
| 3165 | 40 |  |
| 3262 | 50 |  |
| 3096 | 50 | ***** |
| 3188 | 55.55555556 | ***** |
| 3171 | 70 | ***** |
| 3112 | 80 |  |
| 3251 | 80 |  |
| 3160 | 90 |  |
| 3259 | 100 | ***** |
| *Lithophyllum* cf. *pygmaeum* | 3083 | 0 |  |
| 3273 | 0 | ***** |
| 3133 | 0 |  |
| 3124 | 0 |  |
| 3143 | 10 | ***** |
| 3089 | 10 |  |
| 3113 | 20 | ***** |
| 3125 | 20 | ***** |
| 3131 | 30 |  |
| 3207 | 30 |  |
| 3127 | 40 |  |
| 3271 | 63.63636364 | ***** |
| *Melyvonnea* cf. *madagascariensis* | 3115 | 20 | ***** |
| 3153 | 50 |  |
| 3103 | 60 |  |
| 3279 | 70 | ***** |
| 3155 | 70 |  |
| 3287 | 80 | ***** |
| 3090 | 80 | ***** |
| 3187 | 90 |  |
| 3163 | 90 |  |
| 3080 | 90 |  |
| 3146 | 100 | ***** |
| 3208 | 100 |  |
| *Neogoniolithon* cf. *fosliei* | 3137 | 0 |  |
| 3135 | 0 |  |
| 3240 | 0 | ***** |
| 3185 | 0 |  |
| 3129 | 0 |  |
| 3242 | 40 | ***** |
| 3189 | 40 | ***** |
| 3192 | 40 | ***** |
| 3175 | 80 |  |
| 3111 | 80 |  |
| 3252 | 80 |  |
| 3272 | 90 | ***** |
| *Porolithon onkodes* | 3119 | 0 |  |
| 3213 | 0 | ***** |
| 3293 | 0 |  |
| 3219 | 0 |  |
| 3085 | 0 | ***** |
| 3278 | 0 |  |
| 3283 | 0 |  |
| 3087 | 20 | ***** |
| 3128 | 20 | ***** |
| 3233 | 40 |  |
| 3183 | 40 |  |
| 3186 | 80 | ***** |
| *Porolithon* sp.1 | 3253 | 0 |  |
| 3142 | 0 | ***** |
| 3260 | 0 |  |
| 3214 | 0 |  |
| 3162 | 20 |  |
| 3106 | 20 | ***** |
| 3282 | 20 | ***** |
| 3108 | 20 |  |
| 3121 | 30 | ***** |
| 3147 | 30 |  |
| 3241 | 50 |  |
| 3099 | 70 | ***** |
| *Porolithon* sp.2 | 3132 | 10 |  |
| 3255 | 10 | ***** |
| 3238 | 10 |  |
| 3277 | 20 |  |
| 3274 | 20 | ***** |
| 3107 | 20 |  |
| 3244 | 20 |  |
| 3150 | 22.22222222 | ***** |
| 3280 | 30 | ***** |
| 3168 | 44.44444444 |  |
| 3232 | 60 |  |
| 3174 | 70 | ***** |
| *Ramicrusta* sp. | 3195 | 18.18181818 | ***** |
| 3170 | 30 |  |
| 3190 | 60 |  |
| 3086 | 60 | ***** |
| 3276 | 60 |  |
| 3179 | 70 | ***** |
| 3205 | 70 |  |
| 3118 | 70 |  |
| 3258 | 80 | ***** |
| 3225 | 90 |  |
| 3256 | 90 |  |
| 3275 | 100 | ***** |
| *Sporolithon* sp. | 3269 | 30 | ***** |
| 3116 | 80 |  |
| 3149 | 88.88888889 | ***** |
| 3196 | 90 | ***** |
| 3088 | 90 |  |
| 3267 | 90 | ***** |
| 3201 | 90 |  |
| 3159 | 90 | ***** |
| 3079 | 100 |  |
| 3176 | 100 |  |
| 3209 | 100 | ***** |
| 3211 | 100 |  |
| *Titanoderma* cf. *tessellatum* | 3166 | 0 |  |
| 3289 | 0 | ***** |
| 3157 | 30 |  |
| 3095 | 60 | ***** |
| 3243 | 70 | ***** |
| 3094 | 70 |  |
| 3102 | 70 |  |
| 3263 | 80 | ***** |
| 3194 | 90 |  |
| 3202 | 90 |  |
| 3158 | 90 |  |
| 3145 | 100 | ***** |
| *Montipora aequituberculata* | *Adeylithon* cf. *bosencei* | 1102 | 0 |  |
| 1166 | 0 | ***** |
| 1146 | 0 |  |
| 1114 | 0 |  |
| 1239 | 10 |  |
| 1176 | 10 | ***** |
| 1274 | 20 | ***** |
| 1086 | 40 | ***** |
| 1108 | 40 |  |
| 1226 | 80 |  |
| 1170 | 80 |  |
| 1162 | 90 | ***** |
| *Amphiroa* cf. *foliacea* | 1111 | 0 | ***** |
| 1121 | 0 |  |
| 1224 | 0 |  |
| 1252 | 0 | ***** |
| 1267 | 0 |  |
| 1284 | 0 | ***** |
| 1222 | 0 |  |
| 1263 | 0 |  |
| 1260 | 0 | ***** |
| 1285 | 0 |  |
| 1095 | 0 | ***** |
| 1228 | 0 |  |
| Aragonite tile | 1197 | 0 |  |
| 1195 | 0 |  |
| 1143 | 0 |  |
| 1120 | 0 |  |
| 1234 | 0 |  |
| 1293 | 0 | ***** |
| 1160 | 0 |  |
| 1208 | 0 |  |
| 1265 | 0 |  |
| 1242 | 0 |  |
| 1286 | 0 |  |
| 1240 | 0 |  |
| *Hydorlithon* cf. *reinboldii* | 1087 | 0 |  |
| 1287 | 22.22222222 | ***** |
| 1255 | 30 |  |
| 1091 | 40 |  |
| 1180 | 60 |  |
| 1190 | 60 | ***** |
| 1189 | 63.63636364 | ***** |
| 1152 | 70 | ***** |
| 1204 | 80 |  |
| 1193 | 88.88888889 |  |
| 1191 | 90 |  |
| 1254 | 90 | ***** |
| *Lithophyllum* cf. *insipidium* | 1219 | 30 | ***** |
| 1202 | 60 |  |
| 1248 | 60 |  |
| 1215 | 60 |  |
| 1088 | 70 | ***** |
| 1216 | 77.77777778 | ***** |
| 1159 | 80 |  |
| 1098 | 80 | ***** |
| 1158 | 80 |  |
| 1283 | 100 |  |
| 1221 | 100 |  |
| 1184 | 100 | ***** |
| *Lithophyllum* cf. *kotschyanum* | 1236 | 50 | ***** |
| 1099 | 60 |  |
| 1187 | 66.66666667 |  |
| 1281 | 72.72727273 |  |
| 1256 | 80 | ***** |
| 1230 | 81.81818182 | ***** |
| 1093 | 81.81818182 |  |
| 1194 | 88.88888889 | ***** |
| 1084 | 88.88888889 |  |
| 1241 | 90 |  |
| 1227 | 90 |  |
| 1291 | 100 | ***** |
| *Lithothamnion* cf. *proliferum* | 1094 | 0 |  |
| 1141 | 0 |  |
| 1101 | 0 |  |
| 1188 | 0 | ***** |
| 1169 | 0 |  |
| 1273 | 0 | ***** |
| 1271 | 0 |  |
| 1261 | 0 |  |
| 1100 | 10 | ***** |
| 1229 | 10 | ***** |
| 1205 | 20 |  |
| 1295 | 30 | ***** |
| *Lithophyllum* cf. *pygmaeum* | 1175 | 0 |  |
| 1149 | 0 |  |
| 1110 | 0 |  |
| 1212 | 0 | ***** |
| 1247 | 0 |  |
| 1115 | 0 | ***** |
| 1233 | 0 |  |
| 1294 | 0 | ***** |
| 1225 | 9.090909091 | ***** |
| 1164 | 10 |  |
| 1238 | 10 |  |
| 1292 | 10 | ***** |
| *Melyvonnea* cf. *madagascariensis* | 1151 | 33.33333333 | ***** |
| 1124 | 40 |  |
| 1182 | 60 |  |
| 1201 | 63.63636364 |  |
| 1277 | 70 | ***** |
| 1290 | 77.77777778 | ***** |
| 1249 | 80 | ***** |
| 1131 | 80 |  |
| 1262 | 80 |  |
| 1272 | 90 |  |
| 1167 | 100 | ***** |
| 1139 | 100 |  |
| *Neogoniolithon* cf. *fosliei* | 1104 | 0 |  |
| 1128 | 0 |  |
| 1181 | 0 | ***** |
| 1147 | 0 |  |
| 1183 | 0 |  |
| 1235 | 10 | ***** |
| 1083 | 50 | ***** |
| 1280 | 63.63636364 | ***** |
| 1217 | 63.63636364 |  |
| 1198 | 70 |  |
| 1206 | 80 |  |
| 1251 | 90 | ***** |
| *Porolithon onkodes* | 1153 | 0 |  |
| 1144 | 0 |  |
| 1269 | 0 |  |
| 1096 | 0 |  |
| 1117 | 0 | ***** |
| 1123 | 0 |  |
| 1134 | 0 |  |
| 1245 | 0 | ***** |
| 1296 | 22.22222222 | ***** |
| 1122 | 70 |  |
| 1092 | 80 | ***** |
| 1244 | 100 | ***** |
| *Porolithon* sp.1 | 1213 | 0 | ***** |
| 1107 | 0 |  |
| 1156 | 0 |  |
| 1218 | 0 |  |
| 1203 | 0 |  |
| 1177 | 30 | ***** |
| 1150 | 55.55555556 | ***** |
| 1276 | 60 | ***** |
| 1105 | 60 |  |
| 1118 | 60 |  |
| 1090 | 70 |  |
| 1223 | 70 | ***** |
| *Porolithon* sp.2 | 1207 | 0 | ***** |
| 1200 | 0 |  |
| 1145 | 10 |  |
| 1138 | 20 |  |
| 1097 | 50 | ***** |
| 1085 | 50 | ***** |
| 1089 | 50 |  |
| 1165 | 70 | ***** |
| 1199 | 88.88888889 |  |
| 1266 | 90 |  |
| 1148 | 100 |  |
| 1289 | 100 | ***** |
| *Ramicrusta* sp. | 1178 | 10 | ***** |
| 1161 | 10 |  |
| 1157 | 16.66666667 |  |
| 1126 | 20 |  |
| 1081 | 20 |  |
| 1135 | 22.22222222 | ***** |
| 1119 | 30 |  |
| 1140 | 30 | ***** |
| 1275 | 50 | ***** |
| 1103 | 50 |  |
| 1116 | 50 |  |
| 1192 | 100 | ***** |
| *Sporolithon* sp. | 1137 | 0 |  |
| 1127 | 0 | ***** |
| 1179 | 0 |  |
| 1155 | 0 | ***** |
| 1220 | 0 |  |
| 1136 | 0 |  |
| 1279 | 10 | ***** |
| 1130 | 10 |  |
| 1214 | 30 | ***** |
| 1232 | 30 |  |
| 1186 | 30 |  |
| 1168 | 40 | ***** |
| *Titanoderma* cf. *tessellatum* | 1210 | 0 |  |
| 1211 | 0 | ***** |
| 1209 | 0 |  |
| 1270 | 36.36363636 |  |
| 1174 | 60 |  |
| 1142 | 80 | ***** |
| 1113 | 81.81818182 | ***** |
| 1288 | 88.88888889 |  |
| 1133 | 88.88888889 | ***** |
| 1243 | 90 |  |
| 1257 | 90 |  |
| 1253 | 100 | ***** |
| *Mycedium elephantotus* | *Adeylithon* cf. *bosencei* | 2778 | 0 |  |
| 2684 | 0 | ***** |
| 2823 | 0 |  |
| 2819 | 0 |  |
| 2682 | 20 |  |
| 2727 | 40 | ***** |
| 2844 | 50 | ***** |
| 2809 | 60 | ***** |
| 2772 | 60 |  |
| 2840 | 77.77777778 |  |
| 2688 | 80 |  |
| 2835 | 100 | ***** |
| *Amphiroa* cf. *foliacea* | 2649 | 0 | ***** |
| 2663 | 0 |  |
| 2723 | 0 | ***** |
| 2690 | 0 | ***** |
| 2749 | 0 |  |
| 2667 | 0 |  |
| 2821 | 0 | ***** |
| 2659 | 0 |  |
| 2685 | 0 | ***** |
| 2665 | 0 |  |
| 2857 | 0 |  |
| 2739 | 30 |  |
| Aragonite tile | 2724 | 0 |  |
| 2743 | 0 |  |
| 2729 | 0 |  |
| 2838 | 0 |  |
| 2672 | 0 | ***** |
| 2845 | 0 |  |
| 2771 | 0 |  |
| 2736 | 0 |  |
| 2805 | 0 |  |
| 2841 | 0 |  |
| 2668 | 0 |  |
| 2802 | 0 |  |
| *Hydorlithon* cf. *reinboldii* | 2836 | 33.33333333 | ***** |
| 2830 | 55.55555556 |  |
| 2680 | 70 |  |
| 2827 | 77.77777778 | ***** |
| 2848 | 90 |  |
| 2776 | 90 | ***** |
| 2748 | 90 |  |
| 2747 | 90 | ***** |
| 2707 | 90 |  |
| 2720 | 100 |  |
| 2792 | 100 | ***** |
| 2811 | 100 |  |
| *Lithophyllum* cf. *insipidium* | 2824 | 44.44444444 | ***** |
| 2826 | 50 |  |
| 2814 | 50 |  |
| 2833 | 60 |  |
| 2651 | 72.72727273 | ***** |
| 2788 | 75 | ***** |
| 2789 | 77.77777778 |  |
| 2713 | 80 | ***** |
| 2758 | 80 |  |
| 2658 | 80 |  |
| 2692 | 80 |  |
| 2712 | 100 | ***** |
| *Lithophyllum* cf. *kotschyanum* | 2850 | 40 | ***** |
| 2854 | 50 |  |
| 2725 | 60 |  |
| 2859 | 60 |  |
| 2722 | 60 | ***** |
| 2852 | 66.66666667 |  |
| 2858 | 70 | ***** |
| 2846 | 80 | ***** |
| 2818 | 80 |  |
| 2734 | 90 |  |
| 2750 | 100 |  |
| 2705 | 100 | ***** |
| *Lithothamnion* cf. *proliferum* | 2660 | 0 |  |
| 2701 | 0 | ***** |
| 2745 | 0 |  |
| 2677 | 20 |  |
| 2731 | 80 | ***** |
| 2843 | 85.71428571 | ***** |
| 2849 | 87.5 |  |
| 2803 | 88.88888889 | ***** |
| 2687 | 90 |  |
| 2696 | 100 |  |
| 2652 | 100 | ***** |
| 2653 | 100 |  |
| *Lithophyllum* cf. *pygmaeum* | 2740 | 0 |  |
| 2759 | 0 |  |
| 2674 | 0 | ***** |
| 2704 | 0 |  |
| 2718 | 0 |  |
| 2768 | 10 | ***** |
| 2686 | 50 | ***** |
| 2810 | 70 | ***** |
| 2831 | 70 |  |
| 2847 | 80 |  |
| 2760 | 90 |  |
| 2708 | 100 | ***** |
| *Melyvonnea* cf. *madagascariensis* | 2711 | 60 | ***** |
| 2794 | 70 |  |
| 2755 | 75 |  |
| 2798 | 80 |  |
| 2828 | 80 | ***** |
| 2853 | 80 | ***** |
| 2715 | 90 |  |
| 2862 | 90 | ***** |
| 2742 | 100 |  |
| 2779 | 100 | ***** |
| 2730 | 100 |  |
| 2754 | 100 |  |
| *Neogoniolithon* cf. *fosliei* | 2825 | 0 | ***** |
| 2767 | 0 |  |
| 2761 | 10 |  |
| 2706 | 27.27272727 |  |
| 2781 | 50 | ***** |
| 2671 | 50 |  |
| 2770 | 55.55555556 | ***** |
| 2721 | 60 | ***** |
| 2753 | 90 |  |
| 2693 | 90 |  |
| 2732 | 100 |  |
| 2710 | 100 | ***** |
| *Porolithon onkodes* | 2842 | 0 |  |
| 2780 | 0 | ***** |
| 2662 | 0 |  |
| 2676 | 0 |  |
| 2655 | 0 | ***** |
| 2820 | 0 |  |
| 2669 | 40 | ***** |
| 2756 | 60 |  |
| 2703 | 60 | ***** |
| 2719 | 63.63636364 |  |
| 2797 | 70 |  |
| 2832 | 70 | ***** |
| *Porolithon* sp.1 | 2746 | 0 |  |
| 2806 | 0 |  |
| 2650 | 0 | ***** |
| 2861 | 0 |  |
| 2837 | 0 | ***** |
| 2681 | 0 |  |
| 2699 | 0 | ***** |
| 2815 | 0 |  |
| 2775 | 33.33333333 | ***** |
| 2733 | 40 |  |
| 2834 | 60 |  |
| 2700 | 70 | ***** |
| *Porolithon* sp.2 | 2851 | 10 | ***** |
| 2679 | 40 |  |
| 2860 | 50 |  |
| 2790 | 60 |  |
| 2785 | 60 | ***** |
| 2808 | 70 | ***** |
| 2799 | 77.77777778 | ***** |
| 2839 | 80 |  |
| 2813 | 80 |  |
| 2654 | 83.33333333 |  |
| 2698 | 100 |  |
| 2744 | 100 | ***** |
| *Ramicrusta* sp. | 2807 | 44.44444444 | ***** |
| 2817 | 70 |  |
| 2804 | 70 |  |
| 2784 | 70 |  |
| 2795 | 75 | ***** |
| 2678 | 80 | ***** |
| 2769 | 88.88888889 | ***** |
| 2738 | 88.88888889 |  |
| 2782 | 88.88888889 |  |
| 2793 | 90 |  |
| 2647 | 90 |  |
| 2656 | 100 | ***** |
| *Sporolithon* sp. | 2855 | 0 | ***** |
| 2816 | 70 |  |
| 2777 | 80 |  |
| 2726 | 81.81818182 |  |
| 2796 | 88.88888889 | ***** |
| 2787 | 90 |  |
| 2694 | 90 | ***** |
| 2791 | 90.90909091 | ***** |
| 2822 | 100 |  |
| 2762 | 100 |  |
| 2675 | 100 |  |
| 2664 | 100 | ***** |
| *Titanoderma* cf. *tessellatum* | 2714 | 80 |  |
| 2764 | 80 | ***** |
| 2702 | 80 | ***** |
| 2757 | 90 | ***** |
| 2774 | 90 | ***** |
| 2695 | 100 |  |
| 2657 | 100 |  |
| 2773 | 100 |  |
| 2751 | 100 |  |
| 2709 | 100 |  |
| 2661 | 100 |  |
| 2728 | 100 | ***** |
| *Platygyra daedalea* | *Adeylithon* cf. *bosencei* | 2040 | 77.77777778 | ***** |
| 2118 | 80 |  |
| 2127 | 90 | ***** |
| 2095 | 90 | ***** |
| 2076 | 100 |  |
| 2108 | 100 |  |
| 2070 | 100 |  |
| 1957 | 100 | ***** |
| 1963 | 100 |  |
| 2026 | 100 | ***** |
| 1946 | 100 |  |
| 1987 | 100 |  |
| *Amphiroa* cf. *foliacea* | 2144 | 20 | ***** |
| 1982 | 30 |  |
| 2152 | 30 |  |
| 2119 | 40 |  |
| 2145 | 40 |  |
| 2015 | 45.45454545 | ***** |
| 2107 | 60 | ***** |
| 2096 | 60 | ***** |
| 1991 | 60 |  |
| 2042 | 90 |  |
| 2060 | 100 |  |
| 2053 | 100 | ***** |
| Aragonite tile | 1949 | 0 |  |
| 2049 | 0 |  |
| 2126 | 0 |  |
| 2067 | 0 |  |
| 2122 | 0 |  |
| 2112 | 0 | ***** |
| 2143 | 0 |  |
| 2120 | 0 |  |
| 1994 | 0 |  |
| 2146 | 0 |  |
| 1973 | 0 |  |
| 2043 | 0 |  |
| *Hydorlithon* cf. *reinboldii* | 1953 | 80 | ***** |
| 2106 | 90 |  |
| 2128 | 90 |  |
| 2019 | 90.90909091 |  |
| 2011 | 100 |  |
| 2056 | 100 |  |
| 1955 | 100 | ***** |
| 2075 | 100 |  |
| 2093 | 100 | ***** |
| 2131 | 100 | ***** |
| 2090 | 100 |  |
| 2094 | 100 | ***** |
| *Lithophyllum* cf. *insipidium* | 2001 | 80 | ***** |
| 1990 | 80 |  |
| 2099 | 90 |  |
| 1980 | 90 | ***** |
| 2006 | 90 | ***** |
| 2097 | 100 |  |
| 2033 | 100 |  |
| 2110 | 100 | ***** |
| 2130 | 100 |  |
| 1950 | 100 |  |
| 1947 | 100 |  |
| 2029 | 100 | ***** |
| *Lithophyllum* cf. *kotschyanum* | 1995 | 90 | ***** |
| 1992 | 90 |  |
| 2066 | 90 | ***** |
| 1984 | 100 |  |
| 2121 | 100 |  |
| 2048 | 100 |  |
| 2102 | 100 | ***** |
| 2123 | 100 |  |
| 2113 | 100 | ***** |
| 1967 | 100 |  |
| 2052 | 100 |  |
| 1975 | 100 | ***** |
| *Lithothamnion* cf. *proliferum* | 2022 | 0 | ***** |
| 1979 | 37.5 |  |
| 2044 | 60 |  |
| 2034 | 77.77777778 | ***** |
| 2009 | 90 |  |
| 1952 | 90 |  |
| 2083 | 90 | ***** |
| 2061 | 90 | ***** |
| 2104 | 90 |  |
| 1978 | 100 |  |
| 2018 | 100 | ***** |
| 2059 | 100 |  |
| *Lithophyllum* cf. *pygmaeum* | 2025 | 20 | ***** |
| 1960 | 30 |  |
| 2139 | 80 | ***** |
| 2111 | 80 | ***** |
| 2155 | 80 | ***** |
| 2008 | 90 | ***** |
| 2129 | 90 |  |
| 2030 | 90 |  |
| 2141 | 90 |  |
| 2050 | 100 |  |
| 2100 | 100 |  |
| 2072 | 100 | ***** |
| *Melyvonnea* cf. *madagascariensis* | 2045 | 100 |  |
| 1951 | 100 | ***** |
| 2028 | 100 |  |
| 2003 | 100 |  |
| 1996 | 100 |  |
| 1962 | 100 | ***** |
| 2007 | 100 |  |
| 2116 | 100 |  |
| 2023 | 100 | ***** |
| 2151 | 100 |  |
| 2013 | 100 | ***** |
| 2039 | 100 | ***** |
| *Neogoniolithon* cf. *fosliei* | 2005 | 70 | ***** |
| 1993 | 80 |  |
| 2051 | 90 | ***** |
| 2031 | 100 |  |
| 2020 | 100 |  |
| 2117 | 100 | ***** |
| 2101 | 100 |  |
| 2046 | 100 |  |
| 2041 | 100 | ***** |
| 2103 | 100 |  |
| 1964 | 100 |  |
| 1981 | 100 | ***** |
| *Porolithon onkodes* | 2064 | 30 | ***** |
| 2150 | 70 |  |
| 1997 | 80 |  |
| 2032 | 90 | ***** |
| 2024 | 100 |  |
| 1971 | 100 |  |
| 1974 | 100 | ***** |
| 1986 | 100 |  |
| 2098 | 100 | ***** |
| 1961 | 100 |  |
| 2014 | 100 | ***** |
| 2037 | 100 |  |
| *Porolithon* sp.1 | 2135 | 63.63636364 | ***** |
| 1965 | 80 |  |
| 2036 | 90 |  |
| 2081 | 90 | ***** |
| 2082 | 90 |  |
| 2160 | 90.90909091 | ***** |
| 2114 | 100 |  |
| 2077 | 100 |  |
| 2084 | 100 | ***** |
| 2063 | 100 |  |
| 1968 | 100 |  |
| 2062 | 100 | ***** |
| *Porolithon* sp.2 | 2087 | 70 |  |
| 2021 | 100 |  |
| 2069 | 100 |  |
| 2142 | 100 | ***** |
| 2159 | 100 |  |
| 2058 | 100 | ***** |
| 1954 | 100 |  |
| 1972 | 100 |  |
| 1948 | 100 | ***** |
| 2057 | 100 |  |
| 1999 | 100 | ***** |
| 2055 | 100 | ***** |
| *Ramicrusta* sp. | 2124 | 90 |  |
| 1977 | 100 |  |
| 2078 | 100 |  |
| 1988 | 100 | ***** |
| 2035 | 100 | ***** |
| 2136 | 100 | ***** |
| 2027 | 100 |  |
| 1959 | 100 | ***** |
| 2109 | 100 | ***** |
| 2079 | 100 |  |
| 2000 | 100 |  |
| 1958 | 100 |  |
| *Sporolithon* sp. | 2154 | 90 |  |
| 1969 | 100 |  |
| 1966 | 100 |  |
| 1998 | 100 | ***** |
| 2017 | 100 |  |
| 1956 | 100 | ***** |
| 2004 | 100 |  |
| 2133 | 100 | ***** |
| 2157 | 100 |  |
| 2065 | 100 | ***** |
| 2054 | 100 |  |
| 2068 | 100 | ***** |
| *Titanoderma* cf. *tessellatum* | 2125 | 80 |  |
| 2115 | 100 |  |
| 2138 | 100 | ***** |
| 2047 | 100 |  |
| 2073 | 100 | ***** |
| 2002 | 100 |  |
| 2158 | 100 |  |
| 2105 | 100 | ***** |
| 2088 | 100 | ***** |
| 1976 | 100 | ***** |
| 2085 | 100 |  |
| 1945 | 100 |  |
| *Porites lobata* | *Adeylithon* cf. *bosencei* | 2406 | 44.44444444 | ***** |
| 2277 | 50 |  |
| 2297 | 63.63636364 |  |
| 2419 | 70 |  |
| 2386 | 80 | ***** |
| 2311 | 87.5 | ***** |
| 2239 | 88.88888889 | ***** |
| 2397 | 90 |  |
| 2254 | 90 |  |
| 2275 | 90 |  |
| 2257 | 90.90909091 |  |
| 2251 | 100 | ***** |
| *Amphiroa* cf. *foliacea* | 2294 | 0 | ***** |
| 2354 | 9.090909091 |  |
| 2404 | 28.57142857 |  |
| 2394 | 30 |  |
| 2370 | 37.5 | ***** |
| 2236 | 50 | ***** |
| 2367 | 66.66666667 | ***** |
| 2355 | 70 |  |
| 2347 | 80 |  |
| 2267 | 88.88888889 |  |
| 2293 | 90 |  |
| 2261 | 90 | ***** |
| Aragonite tile | 2248 | 0 |  |
| 2304 | 0 |  |
| 2237 | 0 | ***** |
| 2422 | 0 |  |
| 2395 | 0 |  |
| 2377 | 0 |  |
| 2315 | 0 |  |
| 2407 | 0 |  |
| 2291 | 0 |  |
| 2418 | 0 |  |
| 2362 | 0 |  |
| 2241 | 10 |  |
| *Hydorlithon* cf. *reinboldii* | 2393 | 44.44444444 | ***** |
| 2219 | 45.45454545 |  |
| 2278 | 50 |  |
| 2350 | 50 |  |
| 2298 | 77.77777778 | ***** |
| 2389 | 77.77777778 | ***** |
| 2396 | 80 |  |
| 2300 | 80 | ***** |
| 2288 | 91.66666667 |  |
| 2416 | 100 |  |
| 2385 | 100 |  |
| 2321 | 100 | ***** |
| *Lithophyllum* cf*. insipidium* | 2336 | 66.66666667 | ***** |
| 2380 | 77.77777778 |  |
| 2245 | 80 |  |
| 2344 | 88.88888889 | ***** |
| 2231 | 90 | ***** |
| 2364 | 100 |  |
| 2312 | 100 | ***** |
| 2361 | 100 |  |
| 2346 | 100 |  |
| 2326 | 100 | ***** |
| 2411 | 100 |  |
| 2285 | 100 |  |
| *Lithophyllum* cf. *kotschyanum* | 2365 | 30 | ***** |
| 2399 | 66.66666667 |  |
| 2287 | 77.77777778 |  |
| 2316 | 80 | ***** |
| 2322 | 90 | ***** |
| 2281 | 90 |  |
| 2345 | 90 | ***** |
| 2255 | 100 |  |
| 2373 | 100 |  |
| 2421 | 100 |  |
| 2302 | 100 | ***** |
| 2264 | 100 |  |
| *Lithothamnion* cf. *proliferum* | 2342 | 0 |  |
| 2246 | 0 | ***** |
| 2374 | 0 |  |
| 2402 | 10 |  |
| 2229 | 10 | ***** |
| 2238 | 28.57142857 | ***** |
| 2250 | 50 | ***** |
| 2227 | 54.54545455 |  |
| 2292 | 90 |  |
| 2384 | 100 | ***** |
| 2409 | 100 |  |
| *Lithophyllum* cf. *pygmaeum* | 2243 | 0 |  |
| 2242 | 0 | ***** |
| 2286 | 40 |  |
| 2306 | 41.66666667 |  |
| 2319 | 50 |  |
| 2290 | 60 | ***** |
| 2276 | 66.66666667 | ***** |
| 2296 | 66.66666667 | ***** |
| 2221 | 100 |  |
| 2260 | 100 |  |
| 2375 | 100 |  |
| 2381 | 100 | ***** |
| *Melyvonnea* cf*. madagascariensis* | 2332 | 0 | ***** |
| 2391 | 28.57142857 |  |
| 2280 | 33.33333333 |  |
| 2358 | 40 |  |
| 2308 | 40 | ***** |
| 2215 | 40 | ***** |
| 2259 | 54.54545455 | ***** |
| 2351 | 55.55555556 |  |
| 2348 | 62.5 |  |
| 2403 | 62.5 |  |
| 2222 | 81.81818182 |  |
| 2216 | 88.88888889 | ***** |
| *Neogoniolithon* cf. *fosliei* | 2349 | 60 | ***** |
| 2357 | 70 |  |
| 2310 | 75 |  |
| 2339 | 80 | ***** |
| 2295 | 80 |  |
| 2426 | 81.81818182 | ***** |
| 2405 | 88.88888889 | ***** |
| 2430 | 90 |  |
| 2368 | 100 |  |
| 2313 | 100 |  |
| 2363 | 100 |  |
| 2337 | 100 | ***** |
| *Porolithon onkodes* | 2233 | 0 |  |
| 2256 | 0 | ***** |
| 2331 | 22.22222222 |  |
| 2282 | 66.66666667 |  |
| 2217 | 66.66666667 | ***** |
| 2329 | 88.88888889 | ***** |
| 2279 | 90 | ***** |
| 2317 | 100 |  |
| 2335 | 100 |  |
| 2428 | 100 | ***** |
| 2415 | 100 |  |
| 2328 | 100 |  |
| *Porolithon* sp.1 | 2232 | 40 | ***** |
| 2273 | 44.44444444 |  |
| 2423 | 60 |  |
| 2247 | 60 |  |
| 2372 | 66.66666667 | ***** |
| 2289 | 80 | ***** |
| 2309 | 88.88888889 | ***** |
| 2299 | 90.90909091 |  |
| 2369 | 100 |  |
| 2284 | 100 |  |
| 2226 | 100 | ***** |
| 2382 | 100 |  |
| *Porolithon* sp.2 | 2265 | 30 | ***** |
| 2268 | 30 |  |
| 2400 | 33.33333333 |  |
| 2330 | 40 |  |
| 2360 | 50 | ***** |
| 2379 | 50 | ***** |
| 2390 | 77.77777778 | ***** |
| 2341 | 90 |  |
| 2334 | 90 |  |
| 2244 | 90 |  |
| 2270 | 100 | ***** |
| 2376 | 100 |  |
| *Ramicrusta* sp. | 2412 | 54.54545455 | ***** |
| 2378 | 66.66666667 |  |
| 2218 | 88.88888889 | ***** |
| 2359 | 100 |  |
| 2269 | 100 | ***** |
| 2366 | 100 |  |
| 2283 | 100 | ***** |
| 2225 | 100 |  |
| 2272 | 100 |  |
| 2420 | 100 |  |
| 2327 | 100 | ***** |
| 2228 | 100 |  |
| *Sporolithon* sp. | 2266 | 20 | ***** |
| 2258 | 23.07692308 |  |
| 2223 | 30 |  |
| 2240 | 44.44444444 |  |
| 2387 | 50 | ***** |
| 2230 | 58.33333333 | ***** |
| 2340 | 60 | ***** |
| 2408 | 70 |  |
| 2352 | 75 |  |
| 2234 | 80 |  |
| 2271 | 90 |  |
| 2235 | 100 | ***** |
| *Titanoderma* cf. *tessellatum* | 2427 | 77.77777778 | ***** |
| 2220 | 77.77777778 |  |
| 2307 | 81.81818182 |  |
| 2410 | 88.88888889 | ***** |
| 2253 | 88.88888889 | ***** |
| 2414 | 90 | ***** |
| 2301 | 90 |  |
| 2343 | 90 |  |
| 2371 | 100 |  |
| 2324 | 100 |  |
| 2333 | 100 | ***** |
| 2383 | 100 |  |
| *Platygrya sinensis* | *Adeylithon* cf. *bosencei* | 595 | 72.72727273 | ***** |
| 514 | 80 |  |
| 607 | 88.88888889 |  |
| 591 | 88.88888889 | ***** |
| 496 | 90 | ***** |
| 532 | 90 | ***** |
| 537 | 100 |  |
| 634 | 100 |  |
| 480 | 100 |  |
| 463 | 100 |  |
| 624 | 100 |  |
| 491 | 100 | ***** |
| *Amphiroa* cf. *foliacea* | 600 | 0 |  |
| 633 | 0 | ***** |
| 487 | 0 |  |
| 435 | 0 | ***** |
| 592 | 0 |  |
| 459 | 0 | ***** |
| 560 | 0 |  |
| 452 | 0 | ***** |
| 481 | 0 |  |
| 479 | 0 |  |
| 538 | 0 | ***** |
| 563 | 10 |  |
| Aragonite tile | 510 | 0 |  |
| 526 | 0 |  |
| 540 | 0 |  |
| 439 | 0 |  |
| 549 | 0 |  |
| 474 | 0 |  |
| 506 | 0 | ***** |
| 438 | 0 |  |
| 630 | 0 |  |
| 456 | 0 |  |
| 478 | 0 |  |
| 572 | 10 |  |
| *Hydorlithon* cf. *reinboldii* | 573 | 20 | ***** |
| 460 | 40 |  |
| 551 | 44.44444444 |  |
| 620 | 47.05882353 |  |
| 503 | 66.66666667 | ***** |
| 644 | 70 |  |
| 639 | 70 | ***** |
| 455 | 70 | ***** |
| 578 | 80 |  |
| 541 | 90 |  |
| 585 | 90 |  |
| 552 | 100 | ***** |
| *Lithophyllum* cf. *insipidium* | 643 | 0 |  |
| 582 | 0 | ***** |
| 462 | 50 |  |
| 574 | 60 |  |
| 524 | 66.66666667 | ***** |
| 489 | 66.66666667 | ***** |
| 451 | 77.77777778 | ***** |
| 457 | 80 |  |
| 468 | 88.88888889 |  |
| 602 | 100 |  |
| 544 | 100 |  |
| 466 | 100 | ***** |
| *Lithophyllum* cf. *kotschyanum* | 613 | 60 | ***** |
| 436 | 70 |  |
| 543 | 80 | ***** |
| 610 | 90 |  |
| 447 | 90 |  |
| 471 | 90 | ***** |
| 443 | 90 | ***** |
| 580 | 100 |  |
| 484 | 100 |  |
| 550 | 100 |  |
| 575 | 100 |  |
| 558 | 100 | ***** |
| *Lithothamnion* cf. *proliferum* | 458 | 0 | ***** |
| 485 | 40 |  |
| 520 | 77.77777778 |  |
| 516 | 80 |  |
| 527 | 80 | ***** |
| 499 | 85.71428571 | ***** |
| 636 | 88.88888889 |  |
| 542 | 90 | ***** |
| 476 | 100 |  |
| 576 | 100 |  |
| 596 | 100 | ***** |
| 519 | 100 |  |
| *Lithophyllum* cf. *pygmaeum* | 515 | 0 |  |
| 502 | 0 |  |
| 562 | 0 |  |
| 611 | 0 |  |
| 557 | 0 |  |
| 531 | 0 |  |
| 638 | 0 | ***** |
| 597 | 0 |  |
| 446 | 10 | ***** |
| 570 | 10 | ***** |
| 513 | 20 | ***** |
| 637 | 90 | ***** |
| *Melyvonnea* cf. *madagascariensis* | 571 | 40 |  |
| 629 | 40 | ***** |
| 488 | 55.55555556 |  |
| 529 | 70 | ***** |
| 507 | 80 | ***** |
| 501 | 80 |  |
| 500 | 88.88888889 | ***** |
| 465 | 90 |  |
| 605 | 90 |  |
| 565 | 90 |  |
| 533 | 90 |  |
| 648 | 100 | ***** |
| *Neogoniolithon* cf. *fosliei* | 518 | 25 | ***** |
| 642 | 40 |  |
| 593 | 40 |  |
| 450 | 50 |  |
| 467 | 55.55555556 | ***** |
| 647 | 60 | ***** |
| 440 | 60 |  |
| 461 | 70 | ***** |
| 601 | 70 |  |
| 568 | 88.88888889 |  |
| 587 | 100 |  |
| 590 | 100 | ***** |
| *Porolithon onkodes* | 504 | 0 |  |
| 453 | 0 |  |
| 509 | 0 |  |
| 534 | 0 | ***** |
| 493 | 0 |  |
| 486 | 0 | ***** |
| 623 | 0 |  |
| 477 | 60 | ***** |
| 547 | 81.81818182 | ***** |
| 564 | 90 |  |
| 581 | 100 |  |
| 495 | 100 | ***** |
| *Porolithon* sp.1 | 645 | 0 | ***** |
| 589 | 20 |  |
| 627 | 20 |  |
| 618 | 50 |  |
| 556 | 80 | ***** |
| 608 | 90 |  |
| 566 | 90 | ***** |
| 512 | 90 | ***** |
| 448 | 100 |  |
| 615 | 100 |  |
| 641 | 100 | ***** |
| 473 | 100 |  |
| *Porolithon* sp.2 | 472 | 20 | ***** |
| 546 | 20 |  |
| 464 | 22.22222222 |  |
| 475 | 30 |  |
| 536 | 30 |  |
| 604 | 40 | ***** |
| 632 | 50 | ***** |
| 586 | 60 | ***** |
| 469 | 77.77777778 |  |
| 434 | 80 |  |
| 569 | 88.88888889 |  |
| 498 | 90 | ***** |
| *Ramicrusta* sp. | 621 | 50 | ***** |
| 559 | 50 |  |
| 517 | 60 |  |
| 445 | 62.5 |  |
| 616 | 70 | ***** |
| 577 | 77.77777778 | ***** |
| 490 | 88.88888889 | ***** |
| 622 | 90 |  |
| 525 | 90 |  |
| 522 | 90 | ***** |
| 539 | 90 |  |
| 523 | 90 |  |
| *Sporolithon* sp. | 449 | 0 |  |
| 433 | 0 |  |
| 617 | 0 | ***** |
| 530 | 0 |  |
| 454 | 27.27272727 |  |
| 625 | 50 | ***** |
| 628 | 63.63636364 | ***** |
| 441 | 70 | ***** |
| 442 | 70 |  |
| 554 | 80 |  |
| 482 | 87.5 |  |
| 567 | 100 | ***** |
| *Titanoderma* cf. *tessellatum* | 635 | 30 | ***** |
| 444 | 50 |  |
| 505 | 70 |  |
| 535 | 77.77777778 |  |
| 646 | 80 | ***** |
| 492 | 88.88888889 | ***** |
| 494 | 90 | ***** |
| 606 | 90 |  |
| 555 | 100 |  |
| 583 | 100 |  |
| 511 | 100 |  |
| 599 | 100 | ***** |
|  |  |  |  |  |

Table S5. Permutational multivariate analysis of variance (PERMANOVA) statistics comparing the microbiomes of different sample types (crustose coralline algae, coral larvae, and filtered sea water).

|  | df | SS | R2 | MS | F Model | p value |
| --- | --- | --- | --- | --- | --- | --- |
| Sample Type | 2 | 5.45 | 0.01 | 2.73 | 7.16 | 0.001 |
| Residuals | 1042 | 396.87 | 0.99 | 0.38 |  |  |
| Total | 1044 | 402.33 | 1 |  |  |  |

Table S6: Permutational multivariate analysis of variance (PERMANOVA) statistics comparing the microbiome of each crustose coralline algae (CCA) sample and the settlement category it belongs to per coral species.

| *A. hyacinthus* | df | SS | R2 | MS | F Model | p value |
| --- | --- | --- | --- | --- | --- | --- |
| CCA Species | 14 | 10.21 | 0.4 | 0.73 | 2.99 | 0.001 |
| Settlement Category | 2 | 0.57 | 0.02 | 0.29 | 1.18 | 0.095 |
| CCA Species: Settlement Category | 17 | 4.63 | 0.18 | 0.27 | 1.12 | 0.004 |
| Residuals | 41 | 10 | 0.39 | 0.24 |  |  |
| Total | 74 | 25.41 | 1 |  |  |  |
|  |  |  |  |  |  |  |
| *A. tenuis* |  |  |  |  |  |  |
| CCA Species | 14 | 11.21 | 0.44 | 0.8 | 3.45 | 0.001 |
| Settlement Category | 2 | 0.48 | 0.02 | 0.24 | 1.03 | 0.348 |
| CCA Species: Settlement Category | 7 | 1.83 | 0.07 | 0.26 | 1.13 | 0.017 |
| Residuals | 51 | 11.85 | 0.47 | 0.23 |  |  |
| Total | 74 | 25.37 | 1 |  |  |  |
|  |  |  |  |  |  |  |
| *C. aspera* |  |  |  |  |  |  |
| CCA Species | 14 | 12.32 | 0.5 | 0.88 | 3.82 | 0.001 |
| Settlement Category | 2 | 0.46 | 0.02 | 0.23 | 0.99 | 0.488 |
| CCA Species: Settlement Category | 11 | 2.47 | 0.1 | 0.22 | 0.98 | 0.64 |
| Residuals | 41 | 9.44 | 0.38 | 0.23 |  |  |
| Total | 68 | 24.68 | 1 |  |  |  |
|  |  |  |  |  |  |  |
| *C. furcata* |  |  |  |  |  |  |
| CCA Species | 14 | 8.02 | 0.53 | 0.57 | 2.36 | 0.001 |
| Settlement Category | 1 | 0.23 | 0.01 | 0.23 | 0.94 | 0.613 |
| CCA Species: Settlement Category | 3 | 0.66 | 0.04 | 0.22 | 0.9 | 0.865 |
| Residuals | 26 | 6.3 | 0.41 | 0.24 |  |  |
| Total | 44 | 15.21 | 1 |  |  |  |
|  |  |  |  |  |  |  |
| *D. favus* |  |  |  |  |  |  |
| CCA Species | 14 | 11.35 | 0.43 | 0.81 | 3.28 | 0.001 |
| Settlement Category | 2 | 0.68 | 0.03 | 0.34 | 1.37 | 0.006 |
| CCA Species: Settlement Category | 19 | 4.83 | 0.18 | 0.25 | 1.03 | 0.246 |
| Residuals | 38 | 9.4 | 0.36 | 0.25 |  |  |
| Total | 73 | 26.25 | 1 |  |  |  |
|  |  |  |  |  |  |  |
| *E. aspera* |  |  |  |  |  |  |
| CCA Species | 14 | 11.81 | 0.47 | 0.84 | 3.78 | 0.001 |
| Settlement Category | 2 | 0.48 | 0.02 | 0.24 | 1.07 | 0.274 |
| CCA Species: Settlement Category | 16 | 3.76 | 0.15 | 0.23 | 1.05 | 0.158 |
| Residuals | 41 | 9.16 | 0.36 | 0.22 |  |  |
| Total | 73 | 25.2 | 1 |  |  |  |
|  |  |  |  |  |  |  |
| *F. fungites* |  |  |  |  |  |  |
| CCA Species | 14 | 11.57 | 0.45 | 0.83 | 3.46 | 0.001 |
| Settlement Category | 2 | 0.48 | 0.02 | 0.24 | 1.01 | 0.447 |
| CCA Species: Settlement Category | 10 | 2.12 | 0.08 | 0.21 | 0.89 | 0.986 |
| Residuals | 48 | 11.46 | 0.45 | 0.24 |  |  |
| Total | 74 | 25.63 | 1 |  |  |  |
|  |  |  |  |  |  |  |
| *G. favulus* |  |  |  |  |  |  |
| CCA Species | 14 | 12.79 | 0.46 | 0.91 | 3.84 | 0.001 |
| Settlement Category | 2 | 0.5 | 0.02 | 0.25 | 1.06 | 0.309 |
| CCA Species: Settlement Category | 19 | 5 | 0.18 | 0.26 | 1.11 | 0.009 |
| Residuals | 39 | 9.27 | 0.34 | 0.24 |  |  |
| Total | 74 | 27.57 | 1 |  |  |  |
|  |  |  |  |  |  |  |
| *L. corymbosa* |  |  |  |  |  |  |
| CCA Species | 14 | 11.02 | 0.42 | 0.79 | 3.39 | 0.001 |
| Settlement Category | 2 | 0.65 | 0.03 | 0.33 | 1.41 | 0.006 |
| CCA Species: Settlement Category | 16 | 4.75 | 0.18 | 0.3 | 1.28 | 0.001 |
| Residuals | 41 | 9.52 | 0.37 | 0.23 |  |  |
| Total | 73 | 25.93 | 1 |  |  |  |
|  |  |  |  |  |  |  |
| *M. aequituberculata* |  |  |  |  |  |  |
| CCA Species | 14 | 11.39 | 0.43 | 0.81 | 3.41 | 0.001 |
| Settlement Category | 2 | 0.59 | 0.02 | 0.29 | 1.23 | 0.042 |
| CCA Species: Settlement Category | 15 | 4.1 | 0.16 | 0.27 | 1.14 | 0.001 |
| Residuals | 43 | 10.26 | 0.39 | 0.24 |  |  |
| Total | 74 | 26.33 | 1 |  |  |  |
|  |  |  |  |  |  |  |
| *M. elephantotus* |  |  |  |  |  |  |
| CCA Species | 14 | 9.99 | 0.42 | 0.71 | 3.1 | 0.001 |
| Settlement Category | 2 | 0.58 | 0.02 | 0.29 | 1.25 | 0.03 |
| CCA Species: Settlement Category | 15 | 3.78 | 0.16 | 0.25 | 1.1 | 0.014 |
| Residuals | 42 | 9.66 | 0.4 | 0.23 |  |  |
| Total | 73 | 24 | 1 |  |  |  |
|  |  |  |  |  |  |  |
| *P. daedalea* |  |  |  |  |  |  |
| CCA Species | 14 | 10.51 | 0.42 | 0.75 | 2.87 | 0.001 |
| Settlement Category | 2 | 0.31 | 0.01 | 0.15 | 0.58 | 1 |
| CCA Species: Settlement Category | 3 | 0.56 | 0.02 | 0.19 | 0.72 | 1 |
| Residuals | 53 | 13.86 | 0.55 | 0.26 |  |  |
| Total | 72 | 25.24 | 1 |  |  |  |
|  |  |  |  |  |  |  |
| *P. lobata* |  |  |  |  |  |  |
| CCA Species | 14 | 10.51 | 0.4 | 0.75 | 2.81 | 0.001 |
| Settlement Category | 2 | 0.47 | 0.02 | 0.23 | 0.88 | 0.844 |
| CCA Species: Settlement Category | 14 | 3.73 | 0.14 | 0.27 | 1 | 0.487 |
| Residuals | 44 | 11.74 | 0.44 | 0.27 |  |  |
| Total | 74 | 26.46 | 1 |  |  |  |
|  |  |  |  |  |  |  |
| *P. sinensis* |  |  |  |  |  |  |
| CCA Species | 14 | 10.17 | 0.41 | 0.73 | 3 | 0.001 |
| Settlement Category | 2 | 0.57 | 0.02 | 0.29 | 1.19 | 0.039 |
| CCA Species: Settlement Category | 13 | 3.4 | 0.14 | 0.26 | 1.08 | 0.03 |
| Residuals | 45 | 10.88 | 0.43 | 0.24 |  |  |
| Total | 74 | 25.02 | 1 |  |  |  |

Table S7: Pairwise permutational multivariate analysis of variance (PERMANOVA) statistics comparing the microbiome high and low settlement samples per coral species.

| High vs. Low Settlement | F Model | R2 | p value | Sig |
| --- | --- | --- | --- | --- |
| *A. hyacinthus* | 1.95 | 0.03 | 0.002 | * |
| *A. tenuis* | 1.67 | 0.02 | 0.001 | * |
| *C. aspera* | 1.65 | 0.03 | 0.008 | * |
| *C. furcata* | 1.49 | 0.03 | 0.005 | * |
| *D. favus* | 2.4 | 0.04 | 0.001 | * |
| *E. aspera* | 1.97 | 0.03 | 0.001 | * |
| *F. fungites* | 1.03 | 0.02 | 0.346 |  |
| *G. favulus* | 1.97 | 0.04 | 0.001 | * |
| *L. corymbosa* | 2.35 | 0.04 | 0.001 | * |
| *M. aequituberculata* | 2.23 | 0.03 | 0.001 | * |
| *M. elephantotus* | 2.56 | 0.04 | 0.001 | * |
| *P. daedalea* | 1.09 | 0.02 | 0.239 |  |
| *P. lobata* | 1.14 | 0.02 | 0.181 |  |
| *P. sinensis* | 2.27 | 0.03 | 0.001 | * |

Table S8 Amplicon sequence variants (ASVs) of interest found to be significantly correlated with high or low coral larval settlement in at least two of the four analyses performed in this study (Linear models, differential abundance analysis, indicator species analysis and/or random tree model)

| Taxonomy | Coral Settlement | Linear Model Coefficient | Log Fold Change | Indicator Species Value | Random Tree Model Importance |
| --- | --- | --- | --- | --- | --- |
| **Acidobacteriota** |  |  |  |  |  |
| ***Thermoanaerobaculaceae*** |  |  |  |  |  |
| *Thermoanaerobaculaceae* subgroup 10 24265 | Low Settlement |  |  |  |  |
|  | *D. favus* | - | -1.28 ± 0.31 | - | 667.5 |
|  | *P. sinensis* | -0.10 ± 0.02 | -1.28 ± 0.31 | 0.656 | 6380.2 |
| ***Unassigned PAUC26f*** |  |  |  |  |  |
| Unassigned PAUC26f 61194 | High Settlement |  |  |  |  |
|  | *D. favus* | 0.61 ± 0.17 | 0.91± 0.33 | 0.544 | 833.4 |
|  | *G. favulus* | 0.62 ± 0.13 | - | - | 5899.4 |
|  |  |  |  |  |  |
| **Actinobacteriota** |  |  |  |  |  |
| ***Microtrichaceae*** |  |  |  |  |  |
| Sva09966 marine group 23168 | Low Settlement |  |  |  |  |
|  | *P. lobata* | - | - | 0.657 | 652.9 |
|  | *P. sinensis* | - | -1.43 ± 0.39 | 0.773 | 773.2 |
|  |  |  |  |  |  |
| **Bacteroidota** |  |  |  |  |  |
| ***Cyclobacteriaceae*** |  |  |  |  |  |
| *Fulvivirga* 9722 | Low Settlement |  |  |  |  |
|  | *C. furcata* | -0.70 ± 0.18 | -2.52 ± 0.45 | 0.775 | 1542.7 |
| ***Flavobacteriaceae*** |  |  |  |  |  |
| *Aquimarina* 1519 | Low Settlement |  |  |  |  |
|  | *L. corymbosa* | -0.18 ± 0.06 | - | 0.642 | 517.1 |
| *Flagellimonas* 9355 | Low Settlement |  |  |  |  |
|  | *E. aspera* | -0.70 ± 0.16 | -1.89 ± 0.45 | 0.618 | 2086.2 |
|  | *D. favus* | -0.49 ± 0.13 | -1.63 ± 0.36 | - | 1083.5 |
| *Maribacter* 12049 | Low Settlement |  |  |  |  |
|  | *M. elephantotus* | -0.22 ± 0.08 | -1.61 ± 0.49 | 0.796 | 625.3 |
| *Tenacibaculum* 23708 | Low Settlement |  |  |  |  |
|  | *D. favus* | -0.61 ± 0.22 | - | - | 639.4 |
|  | High Settlement |  |  |  |  |
|  | *A. tenuis* | - | - | 0.793 | 1096 |
| Unassigned *Flavobacteraiceae* 43816 | High Settlement |  |  |  |  |
|  | *C. aspera* | 0.40 ± 0.14 | - | 0.583 | 2049.1 |
| ***Hyphomicrobiaceae*** |  |  |  |  |  |
| *Filomicrobium* 9313 | Low Settlement |  |  |  |  |
|  | *E. aspera* | -0.15 ± 0.06 | -0.99 ± 0.28 | - | - |
| *Filomicrobium* 9329 | High Settlement |  |  |  |  |
|  | *D. favus* | 0.91 ± 0.17 | 2.10 ± 0.44 | 0.678 | 4709.3 |
|  | *E. aspera* | 0.59 ± 0.17 | 2.03 ± 0.54 | 0.641 | 667.9 |
|  | *L. corymbosa* | 0.15 ± 0.05 | - | - | 433.4 |
|  | *M. elephantotus* | 0.22 ± 0.05 | - | - | 1936.5 |
|  | *P. sinensis* | 0.17 ± 0.05 | 2.10 ± 0.44 | - | 481 |
| *Filomicrobium* 9337 | Low Settlement |  |  |  |  |
|  | *D. favus* | -0.58 ± 0.12 | -2.49 ± 0.36 | 0.655 | 4935.8 |
|  | *G. favulus* | - | - | 0.584 | 503.1 |
|  | *M. elephantotus* | -0.15 ± 0.03 | -2.12 ± 0.44 | 0.639 | 1345.9 |
|  | *E. aspera* | -0.42 ± 0.13 | -2.13 ± 0.50 | 0.711 | - |
|  | *P. sinensis* | - | -2.49 ± 0.36 | 0.592 | - |
| ***Saprospiraceae*** |  |  |  |  |  |
| *Lewinella* 11613 | Low Settlement |  |  |  |  |
|  | *M. aequituberculata* | - | - | 0.654 | 1900.6 |
| *Lewinella* 11670 | Low Settlement |  |  |  |  |
|  | *D. favus* | - | -1.34 ± 0.48 | 0.667 | - |
|  | *M. aequituberculata* | - | -0.21 ± 0.06 | 0.667 | 3494.9 |
|  |  |  |  |  |  |
| **Bdellovibrionota** |  |  |  |  |  |
| ***Bdellovibrionaceae*** |  |  |  |  |  |
| *Bdellovibrio* 2487 | High Settlement |  |  |  |  |
|  | *M. elephantotus* | 0.24 ± 0.06 | 1.10 ± 0.34 | - | 1092.7 |
|  |  |  |  |  |  |
| **Crenarchaeota** |  |  |  |  |  |
| ***Nitrosopumilaceae*** |  |  |  |  |  |
| Candidatus *Nitrosopumilus* 5680 | High Settlement |  |  |  |  |
|  | *D. favus* | 1.01 ± 0.24 | 1.43 ± 0.48 | - | 499.7 |
|  | *P. sinensis* | 0.22 ± 0.09 | 1.43 ± 0.48 | - | - |
| Candidatus *Nitrosopumilus* 5799 | High Settlement |  |  |  |  |
|  | *D. favus* | 1.12 ± 0.37 | - | 0.573 | - |
|  | *L. corymbosa* | 0.11 ± 0.04 | - | - | 551.2 |
|  | *P. sinensis* | 0.35 ± 0.07 | - | 0.694 | 2306.6 |
|  |  |  |  |  |  |
| **Desulfobacterota** |  |  |  |  |  |
| Unassigned PB19 61608 | Low Settlement |  |  |  |  |
|  | *D. favus* | -0.600 ± 0.17 | -1.60 ± 0.37 | 0.708 | 648.8 |
|  | *P. sinensis* | - | -1.60 ± 0.37 | 0.633 | - |
|  |  |  |  |  |  |
| **Planctomycetota** |  |  |  |  |  |
| ***Phycisphaeraceae*** |  |  |  |  |  |
| Urania-1B-19 marine sediemnt group 79403 | Low Settlement |  |  |  |  |
|  | *C. furcata* | -0.35 ± 0.07 | -1.39 ± 0.34 | 0.697 | 1619 |
| Urania-1B-19 marine sediemnt group 79717 | High Settlement |  |  |  |  |
|  | *F. fungites* | 0.39 ± 0.14 | - | 0.619 | - |
| *Blastopirellula* 3098 | Low Settlement |  |  |  |  |
|  | *M. elephantotus* | -0.18 ± 0.04 | -1.84 ± 0.35 | 0.746 | 30118.2 |
| Pir4 lineage 17037 | Low Settlement |  |  |  |  |
|  | *D. favus* | - | -1.20 ± 0.37 | - | 503.3 |
| Pir4 lineage 17140 | Low Settlement |  |  |  |  |
|  | *M. elephantotus* | -0.21 ± 0.06 | -2.54 ± 0.55 | 0.758 | 4383.2 |
| ***Rubinisphaeraceae*** |  |  |  |  |  |
| Unassigned *Rubinisphaeraceae* 68411 | Low Settlement |  |  |  |  |
|  | *D. favus* | -0.30 ± 0.13 | -1.76 ± 0.41 | 0.663 | 1204.9 |
| **Unassigned OM190** |  |  |  |  |  |
| Unassigned OM190 59838 | Low Settlement |  |  |  |  |
|  | *E. aspera* | -0.43 ± 0.15 | -1.16 ± 0.34 | 0.697 | 510.7 |
| Unassigned OM190 57962 | Low Settlement |  |  |  |  |
|  | *A. hyacinthus* | -0.65 ± 0.17 | - | 0.591 | 614.7 |
|  | *M. elephantotus* | - | -1.35 ± 0.37 | 0.759 | - |
|  |  |  |  |  |  |
| **Proteobacteria** |  |  |  |  |  |
| ***Granulosicoccaceae*** |  |  |  |  |  |
| *Granulosicoccus* 9935 | Low Settlement |  |  |  |  |
|  | *C. furcata* | -0.58 ± 0.10 | -1.78 ± 0.45 | 0.755 | 2082.7 |
|  | *M. elephantotus* | - | -1.64 ± 0.4 | 0.757 | 2953.1 |
|  | High Settlement |  |  |  |  |
|  | *P. daedalea* | 0.35 ± 0.11 | - | - | 334.9 |
| ***Kiloniellaceae*** |  |  |  |  |  |
| *Limibacillus* 11732 | High Settlement |  |  |  |  |
|  | *D. favus* | 0.53 ± 0.17 | 1.27 ± 0.38 | 0.583 | 824.1 |
|  | *P. sinensis* | 0.21 ± 0.06 | 1.27 ± 0.38 | - | - |
| *Limibaculum* 11762 | Low Settlement |  |  |  |  |
|  | *D. favus* | - | -1.65 ± 0.45 | 0.692 | - |
|  | *L. corymbosa* | -0.19 ± 0.06 | - | 0.704 | 1037.6 |
|  | *P. sinensis* | - | -1.65 ± 0.45 | 0.666 | - |
| *Pelagibius* 15321 | Low Settlement |  |  |  |  |
|  | *A. tenuis* | - | -1.72 ± 0.39 | 0.631 | 1240.4 |
| ***Marinobacteraceae*** |  |  |  |  |  |
| *Marinobacter* 12244 | High Settlement |  |  |  |  |
|  | *G. favulus* | - | - | 0.587 | 496.3 |
|  | *M. elephantotus* | 0.20 ± 0.05 | 1.59 ± 0.42 | 0.615 | 783.5 |
| ***Methyloligellaceae*** |  |  |  |  |  |
| Unassigned *Methyloligellaceae* 52562 | High Settlement |  |  |  |  |
|  | *C. aspera* | 0.58 ± 0.13 | - | 0.594 | 1031.4 |
| ***Nitrincolaceae*** |  |  |  |  |  |
| *Neptuniibacter* 13322 | High Settlement |  |  |  |  |
|  | *G. favulus* | 0.44 ± 0.12 | - | - | 651.1 |
|  | *M. elephantotus* | 0.26 ± 0.08 | 1.98 ± 0.63 | - | - |
|  | *P. sinensis* | 0.10 ± 0.03 | - | - | 389.8 |
| *Neptuniibacter* 13326 | High Settlement |  |  |  |  |
|  | *L. corymbosa* | 0.18 ± 0.07 | - | - | 3894.6 |
|  | *M. elephantotus* | 0.17 ± 0.07 | - | 0.665 | 1640.6 |
| *Neptuniibacter* 13337 | High Settlement |  |  |  |  |
|  | *P. sinensis* | 0.19 ± 0.07 | - | 0.809 | 1005.7 |
| ***Rhizobiaceae*** |  |  |  |  |  |
| Lentilitoribacter 11308 | Low Settlement |  |  |  |  |
|  | *C. aspera* | - | - | 0.737 | 465.4 |
|  | *D. favus* | - | -1.30 ± 0.39 | - | 1177.6 |
|  | *L. corymbosa* | - | - | 0.654 | 467.6 |
| Unassigned *Rhizobiaceae* 66456 | Low Settlement |  |  |  |  |
|  | *D. favus* | -0.43 ± 0.17 | -1.84 ± 0.5 | 0.55 | 475.4 |
|  | *P. sinensis* | - | -1.84 ± 0.5 | 0.619 | - |
| Unassigned *Rhizobiaceae* 66482 | High Settlement |  |  |  |  |
|  | *G. favulus* | 0.68 ± 0.2 | - | 0.668 | 2035.1 |
| ***Rhodobacteraceae*** |  |  |  |  |  |
| *Roseovarius* 20547 | Low Settlement |  |  |  |  |
|  | *C. furcata* | -0.61 ± 0.17 | -2.06 ± 0.54 | 0.808 | 535.3 |
| *Ruegeria* 20979 | Low Settlement |  |  |  |  |
|  | *M. aequituberculata* | -0.10 ± 0.03 | -1.82 ± 0.41 | - | 4312.8 |
| Unassigned *Rhodobacteraceae* 66734 | Low Settlement |  |  |  |  |
|  | *C. aspera* | - | - | 0.715 | 709.2 |
| Unassigned *Rhodobacteraceae* 67059 | Low Settlement |  |  |  |  |
|  | *A. hyacinthus* | -0.57 ± 0.15 | -1.93 ± 0.45 | 0.667 | 4137 |
|  | *D. favus* | -0.37 ± 0.13 | -1.37 ± 0.49 | - | - |
|  | *P. sinensis* | -0.09 ± 0.04 | -1.37 ± 0.49 | - | - |
| Unassigned *Rhodobacteraceae* 67244 | Low Settlement |  |  |  |  |
|  | *C. aspera* | -0.67 ± 0.20 | - | 0.812 | 2988.9 |
|  | *D. favus* | -0.43 ± 0.17 | -1.71 ± 0.55 | - | 797.4 |
| ***Unassigned Alphaproteobacteria*** |  |  |  |  |  |
| Unassigned Alphaproteobacteria 27920 | High Settlement |  |  |  |  |
|  | *E. aspera* | 0.79 ± 0.20 | - | 0.63 | - |
| ***Unassigned Gammaproteobacteria*** |  |  |  |  |  |
| Unassigned Gammaproteobacteria 44435 | Low Settlement |  |  |  |  |
|  | *C. furcata* | -1.06 ± 0.27 | -2.41 ± 0.60 | 0.866 | 878.6 |
|  | *G. favulus* | -0.37 ± 0.12 | - | - | 881.2 |
| Unassigned Gammaproteobacteria 45636 | Low Settlement |  |  |  |  |
|  | *C. furcata* | -0.56 ± 0.09 | -1.86 ± 0.42 | 0.764 | 2113.6 |
|  | *M. elephantotus* | -0.13 ± 0.04 | -1.50 ± 0.34 | 0.672 | 2006 |
| ***Unassigned KI89A*** |  |  |  |  |  |
| Unassigned KI89A 50048 | Low Settlement |  |  |  |  |
|  | *A. tenuis* | - | -1.70 ± 0.45 | 0.603 | 720.2 |
| ***Unassigned EC3*** |  |  |  |  |  |
| Unassigned EC3 42202 | Low Settlement |  |  |  |  |
|  | *D. favus* | -0.31 ± 0.13 | -1.25 ± 0.38 | - | - |
|  | *G. favulus* | -0.57 ± 0.19 | - | 0.558 | 1366.8 |
|  | *P. sinensis* | -0.20 ± 0.05 | -1.25 ± 0.38 | 0.759 | 4008.1 |
| ***Unassigned Thalassobaculales*** |  |  |  |  |  |
| Unassigned Thalassobaculales 75494 | High Settlement |  |  |  |  |
|  | *A. hyacinthus* | - | 1.73 ± 0.42 | 0.62 | 3725.7 |
|  |  |  |  |  |  |
| **Unassigned Bacteria** |  |  |  |  |  |
| Unassigned Bacteria 33069 | Low Settlement |  |  |  |  |
|  | *E. aspera* | -0.43 ± 0.13 | -0.99 ± 0.28 | 0.682 | 1833.9 |
|  | *P. sinensis* | -0.10 ± 0.04 | - | 0.641 | - |
|  |  |  |  |  |  |
| **Verrucomicrobiota** |  |  |  |  |  |
| ***Rubritaleaceae*** |  |  |  |  |  |
| *Roseibacillus* 20376 | Low Settlement |  |  |  |  |
|  | *C. furcata* | -0.77 ± 0.24 | -3.10 ± 0.72 | 0.903 | 1384.6 |
|  | *P. sinensis* | -0.29 ± 0.06 | - | 0.722 | 5613.9 |
| *Rubritalea* 20963 | Low Settlement |  |  |  |  |
|  | *G. favulus* | -0.85 ± 0.26 | - | - | 1185.3 |

***Individual Coral Species Results***

***Acropora hyacinthus***

There was a significant difference between the high and low settlement crustose coralline algae (CCA) microbial communities (PERMANOVA: F=1.95, p<0.011), with specific amplicon sequence variants (ASVs) found from a combination of linear models, differential abundance, indicator species, and random forest (RF) analyses. Two ASVs were associated with high settlement and are found across most high settlement samples, regardless of CCA species (Figure S2). Six ASVs were associated with low settlement are found in specific low settlement CCA species (Figure S2). While most ASVs associated with low settlement were identified as low settlement indicators and had varying levels of RT model importance values, an unassigned *Rhodobacteraceae* ASV was identified in all four methods and is most abundant in *A.* cf. *foliacea* samples (Figure S2).


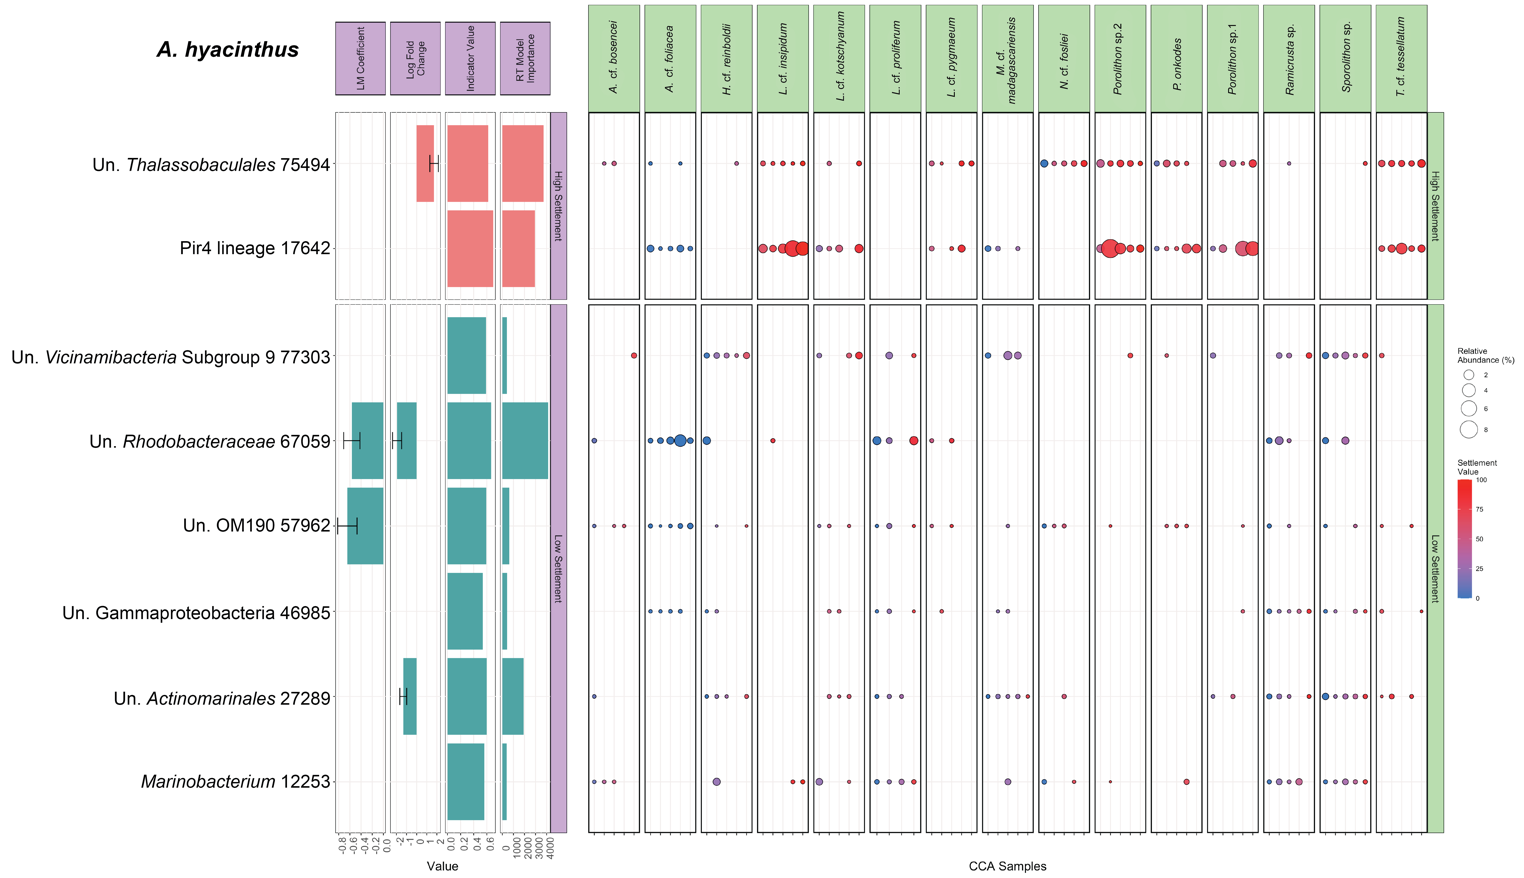


Figure S2. Amplicon sequence variants (ASVs) of interest associated with high and low *A. hyacinthus* settlement. ASVs were deemed of interest if they had significant results in two out of the four methods used (Linear models, differential abundance, indicator species, and random forest analyses). Results are visualised as bars for each ASV, and the greater the value the stronger the association between the ASV and settlement. ASV distribution is visualised across all samples grouped by crustose coralline algae in the bubble plot. The size of the bubble corresponds to the ASVs relative abundance, and the colour refers to the settlement score in the given sample (Red = high settlement, Blue = low settlement). Each ASV is labeled with a unique number to differentiate individual ASVs across the entire dataset.

***Acropora tenuis***

There was a significant difference between the high and low settlement crustose coralline algae (CCA) microbial communities (PERMANOVA: F=1.67, p<0.006), with specific amplicon sequence variants (ASVs) found from a combination of linear models, differential abundance, indicator species, and random forest (RF) analyses. Four ASVs were associated with low settlement were mainly present in *A.* cf. *foliacea* low settlement samples (Figure S3). These low settlement taxa consisted of a diverse group of taxa with an unassigned KI89A clade ASV having the highest relative abundance across samples and found to be differentially abundant, an indicator, and predicted to be associated/of low settlement.


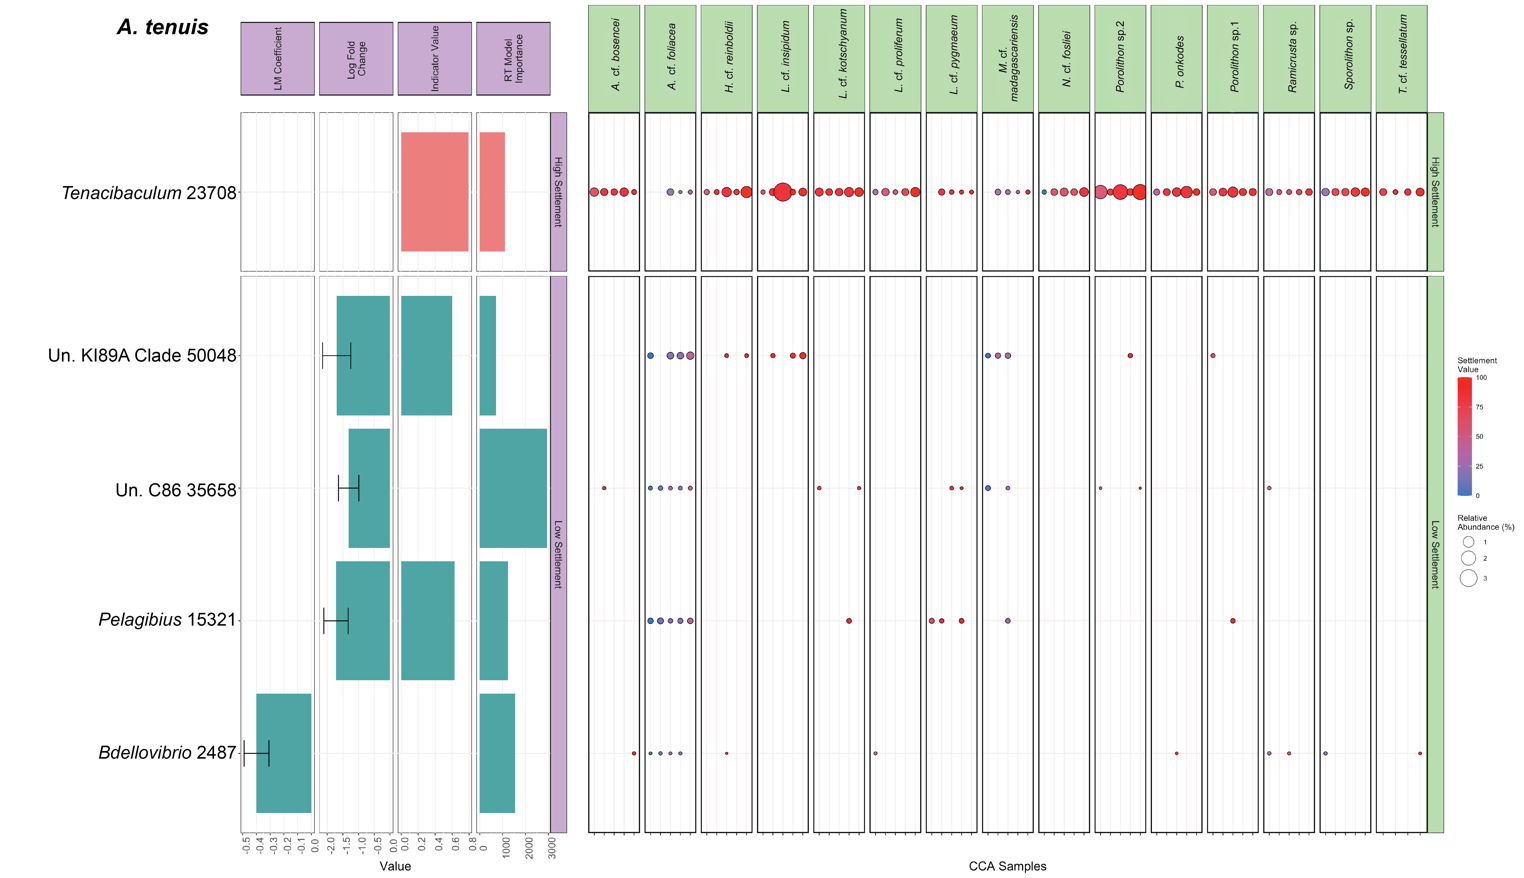


Figure S3. Amplicon sequence variants (ASVs) of interest associated with high and low *A. tenuis* settlement. ASVs were deemed of interest if they had significant results in two out of the four methods used (Linear models, differential abundance, indicator species, and random forest analyses). Method results are visualised as bars for each ASV, and the greater the method value the more associated the ASV is with high or low settlement samples. ASV distribution is visualised across all samples grouped by crustose coralline algae in the bubble plot. The size of the bubble corresponds to the ASVs relative abundance, and the colour refers to the settlement score in the given sample (Red = high settlement, Blue = low settlement). Each ASV is labeled with an arbitrary number to differentiate individual ASVs across the entire dataset.

***Coelastrea aspera***

There was a significant difference between the high and low settlement crustose coralline algae (CCA) microbial communities (PERMANOVA: F=1.65, p<0.04), with specific amplicon sequence variants (ASVs) found from a combination of linear models, differential abundance, indicator species, and random forest (RF) analyses. Six ASVs were associated with high settlement, however, they are found sporadically across CCA samples in low abundance (Figure S4). No ASVs were found to be significantly differentially abundant between high and low settlement samples, therefore only linear model, indicator species, and random forest analyses were analysed.


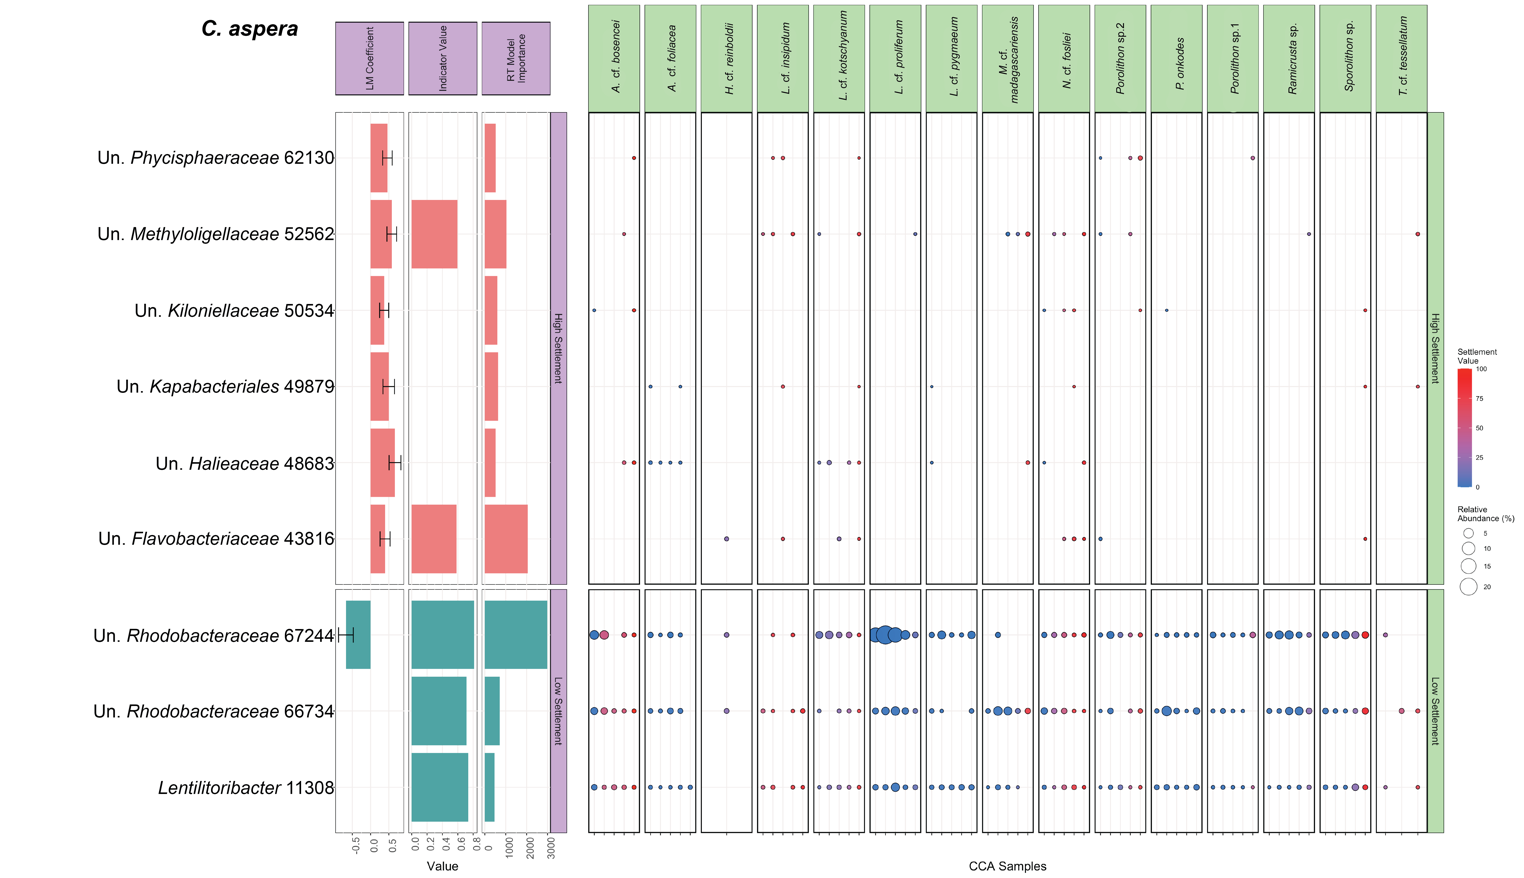


Figure S4. Amplicon sequence variants (ASVs) of interest associated with high and low *C. aspera* settlement. ASVs were deemed of interest if they had significant results in two out of the four methods used (Linear models, differential abundance, indicator species, and random forest analyses). Method results are visualised as bars for each ASV, and the greater the method value the more associated the ASV is with high or low settlement samples. No ASVs were significantly differential abundant in either high or low settlement. ASV distribution is visualised across all samples grouped by crustose coralline algae in the bubble plot. The size of the bubble corresponds to the ASVs relative abundance, and the colour refers to the settlement score in the given sample (Red = high settlement, Blue = low settlement). Each ASV is labeled with an arbitrary number to differentiate individual ASVs across the entire dataset.

***Caulastrea furcata***

There was a significant difference between the high and low settlement crustose coralline algae (CCA) microbial communities (PERMANOVA: F=1.49, p<0.005), with specific amplicon sequence variants (ASVs) found from a combination of linear models, differential abundance, indicator species, and random forest (RF) analyses. No ASVs were associated with high settlement, but 29 ASVs were associated with low settlement (Figure S5). These ASVs were largely absent from high settlement CCA such as *M.* cf. *madagascariensis, N.* cf. *fosliei, Porolithon* sp.2, and *Sporolithon* sp. (Figure S5). *Amphiroa* cf. *foliacea* and *Porolithon* sp.1 samples contained a majority of low settlement associated ASVs, with higher abundances in low settlement samples.Of these ASVs, 8 ASVs were found to be significantly associated with low settlement in all methods tested, which were associated with *Phycisphaeraceae*, Gammaproteobacteria*, Rubritaleaceae, Pirellulaceae, Granulosicoccaceae,* and *Cyclobacteriaceae* (Figures S5).


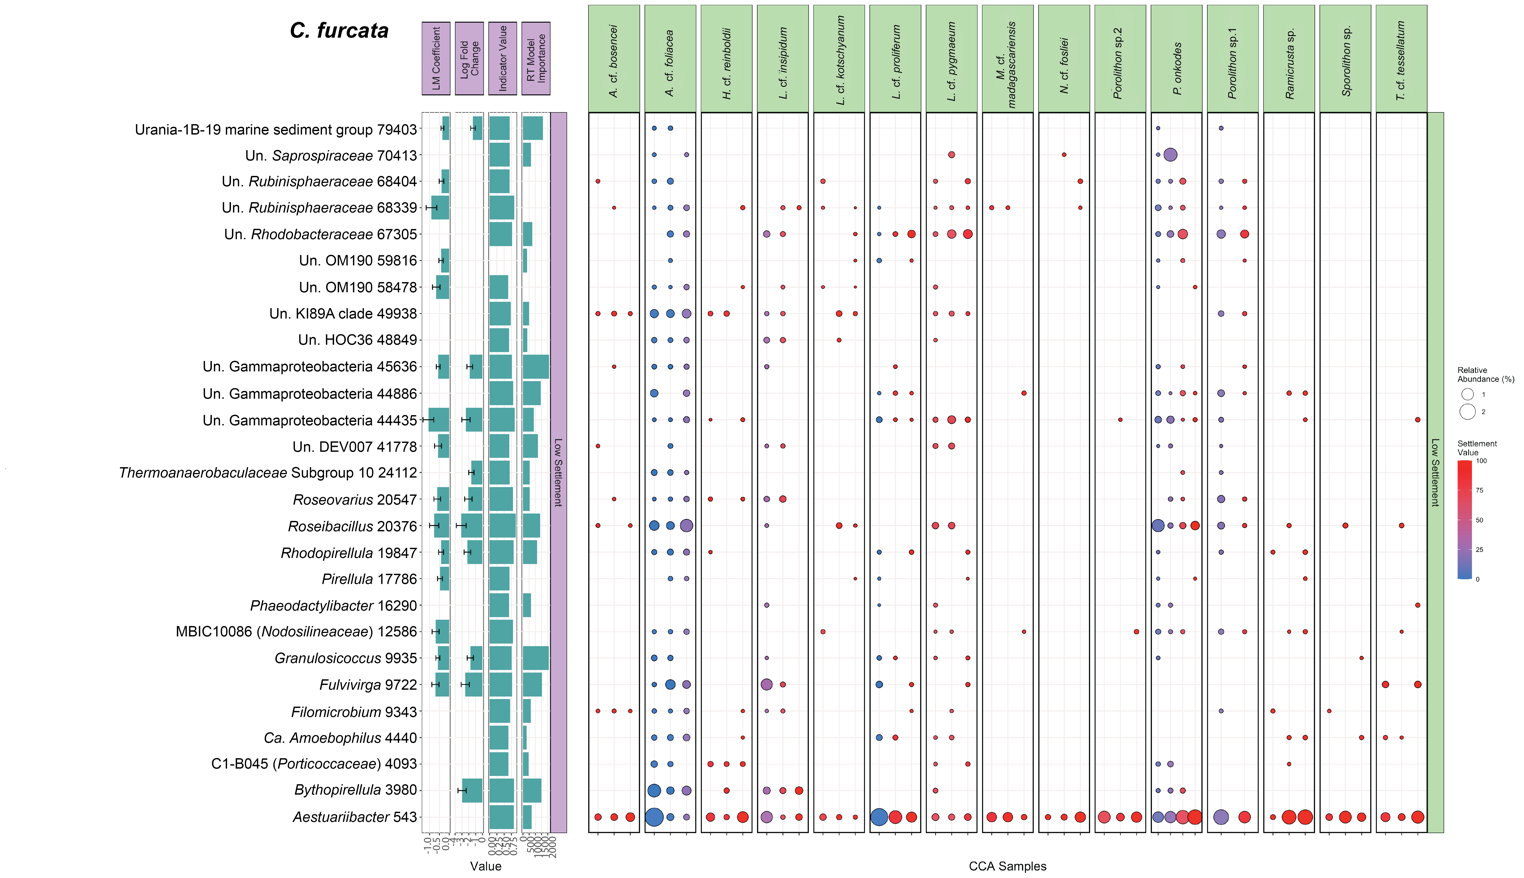


Figure S5. Amplicon sequence variants (ASVs) of interest associated with high and low *C. furcata* settlement. ASVs were deemed of interest if they had significant results in two out of the four methods used (Linear models, differential abundance, indicator species, and random forest analyses). Method results are visualised as bars for each ASV, and the greater the method value the more associated the ASV is with high or low settlement samples. ASV distribution is visualised across all samples grouped by crustose coralline algae in the bubble plot. The size of the bubble corresponds to the ASVs relative abundance, and the colour refers to the settlement score in the given sample (Red = high settlement, Blue = low settlement). Each ASV is labeled with an arbitrary number to differentiate individual ASVs across the entire dataset.

***Dipsastrea favus***

There was a significant difference between the high and low settlement crustose coralline algae (CCA) microbial communities (PERMANOVA: F=2.40, p<0.006), with specific amplicon sequence variants (ASVs) found from a combination of linear models, differential abundance, indicator species, and random forest (RF) analyses. Fourteen ASVs were associated with high settlement, which consisted of *Pirellulaceae*, *Nitrosopumilaceae, Hyphomicrobiaceae, Kiloniellaceae, Nitrospiraceae,* PS1 clade and unassigned taxa within PAUC26f and Alphaproteobactiera (Figure S6). These taxa were absent from low settlement CCA *A.* cf. *foliacea* and found in the high settlement samples of all other species of CCA (Figure S6). Sixty-one ASVs were associated with low settlement with most taxa belonging to Planctomycetes or *Flavobacteriaceae* (Figure S6). These taxa were largely present in *A.* cf. *foliacea* and in the low settlement samples of other CCA species, except *M.* cf. *madagascariensis* (Figure S6).


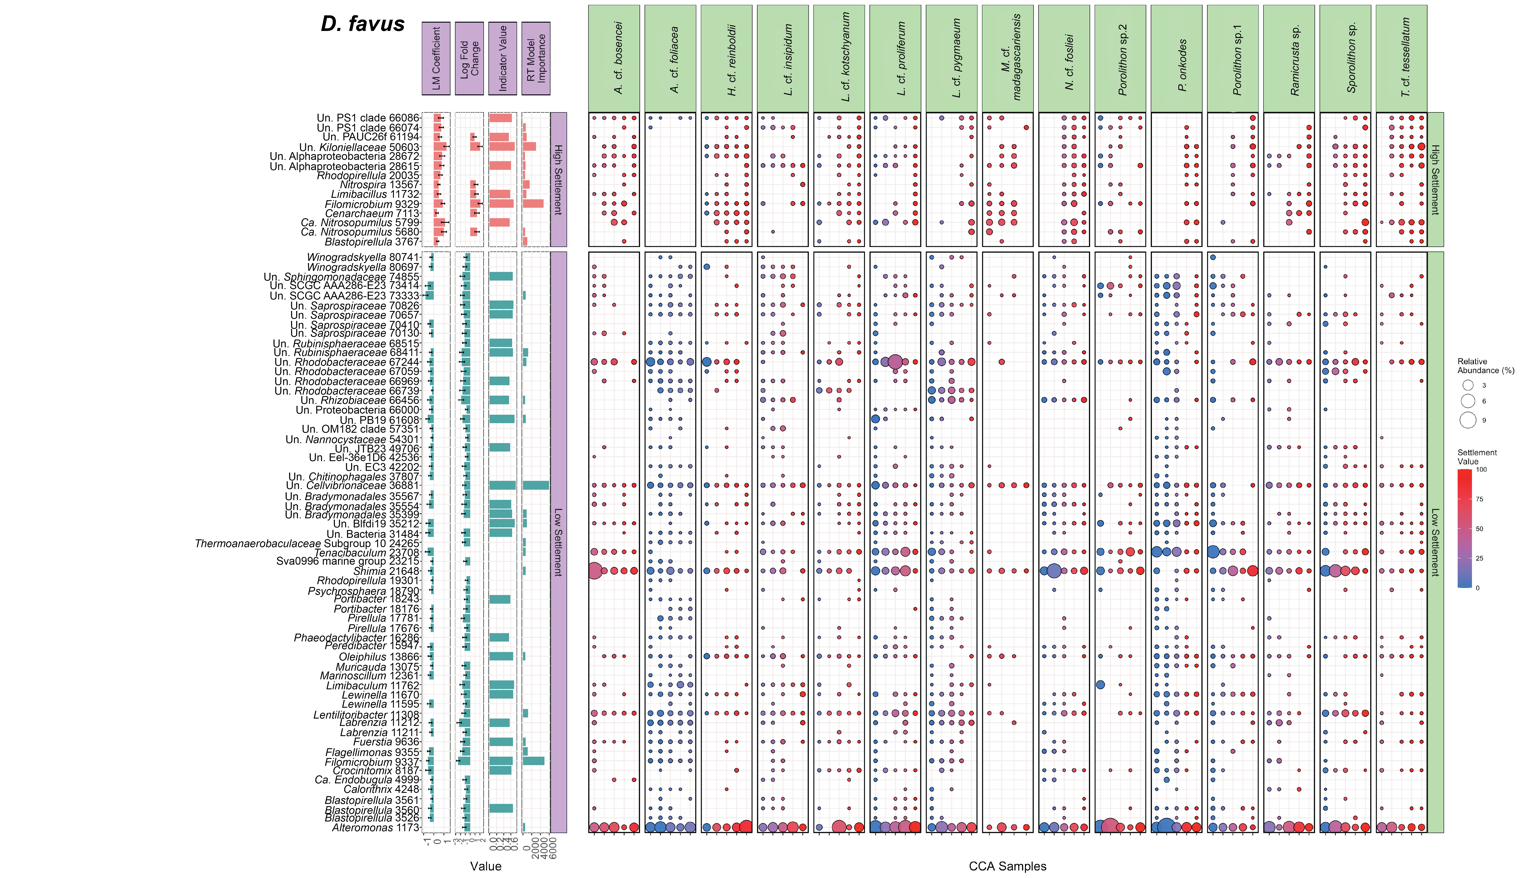


Figure S6. Amplicon sequence variants (ASVs) of interest associated with high and low *D. favus* settlement. ASVs were deemed of interest if they had significant results in two out of the four methods used (Linear models, differential abundance, indicator species, and random forest analyses). Method results are visualised as bars for each ASV, and the greater the method value the more associated the ASV is with high or low settlement samples. ASV distribution is visualised across all samples grouped by crustose coralline algae in the bubble plot. The size of the bubble corresponds to the ASVs relative abundance, and the colour refers to the settlement score in the given sample (Red = high settlement, Blue = low settlement). Each ASV is labeled with an arbitrary number to differentiate individual ASVs across the entire dataset.

***Echinophyllia aspera***

There was a significant difference between the high and low settlement crustose coralline algae (CCA) microbial communities (PERMANOVA: F=1.97, p<0.006), with specific amplicon sequence variants (ASVs) found from a combination of linear models, differential abundance, indicator species, and random forest (RF) analyses. Only two ASVs were associated with high settlement, and one ASV found to be significant for all four methods, a *Filomicrobium* ASV (Figure S7). The *Filomicrobium* ASV was found in at least one high settlement sample for every single CCA species except *A.* cf. *foliacea* and *L.* cf. *pygmaeum* (Figure S7). There were 32 ASVs associated with low settlement and consisted of a diversity of taxa including two *Filomicrobium,* Pir4 lineage (*Pirellulaceae*), and *Rubritalea* ASVs (Figure S7). *Amphiroa* cf. *foliacea* and low settlement *Porolithon* sp.2 samples had the highest number of ASVs associated with low settlement present compared to the other CCA species(Figure S7).


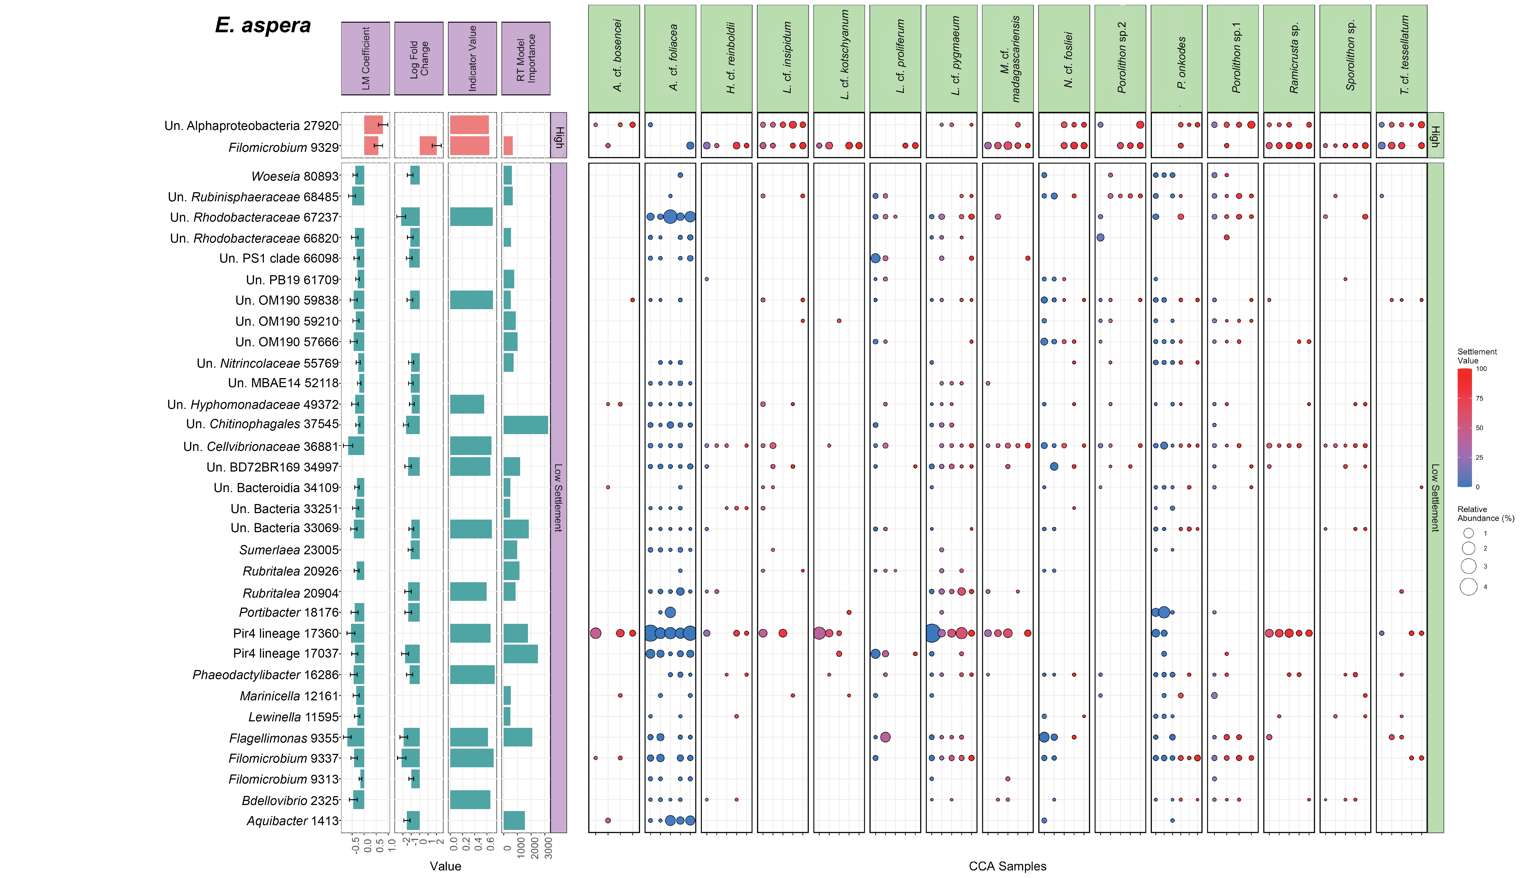


Figure S7. Amplicon sequence variants (ASVs) of interest associated with high and low *E. aspera* settlement. ASVs were deemed of interest if they had significant results in two out of the four methods used (Linear models, differential abundance, indicator species, and random forest analyses). Method results are visualised as bars for each ASV, and the greater the method value the more associated the ASV is with high or low settlement samples. ASV distribution is visualised across all samples grouped by crustose coralline algae in the bubble plot. The size of the bubble corresponds to the ASVs relative abundance, and the colour refers to the settlement score in the given sample (Red = high settlement, Blue = low settlement). Each ASV is labeled with an arbitrary number to differentiate individual ASVs across the entire dataset.

***Fungia fungites***

There was no significant difference between the high and low settlement crustose coralline algae (CCA) microbial communities (PERMANOVA: F=1.03, p=0.456) and likely not responding to microbial cues. Fifteen ASVs associated with high settlement were identified with linear models, indicator species analysis and random tree analysis, however, the sample distribution between high settlement (n = 6) and low settlement samples (n = 61) is disproportionate, and therefore might introduce some bias to these results (Figure S8).


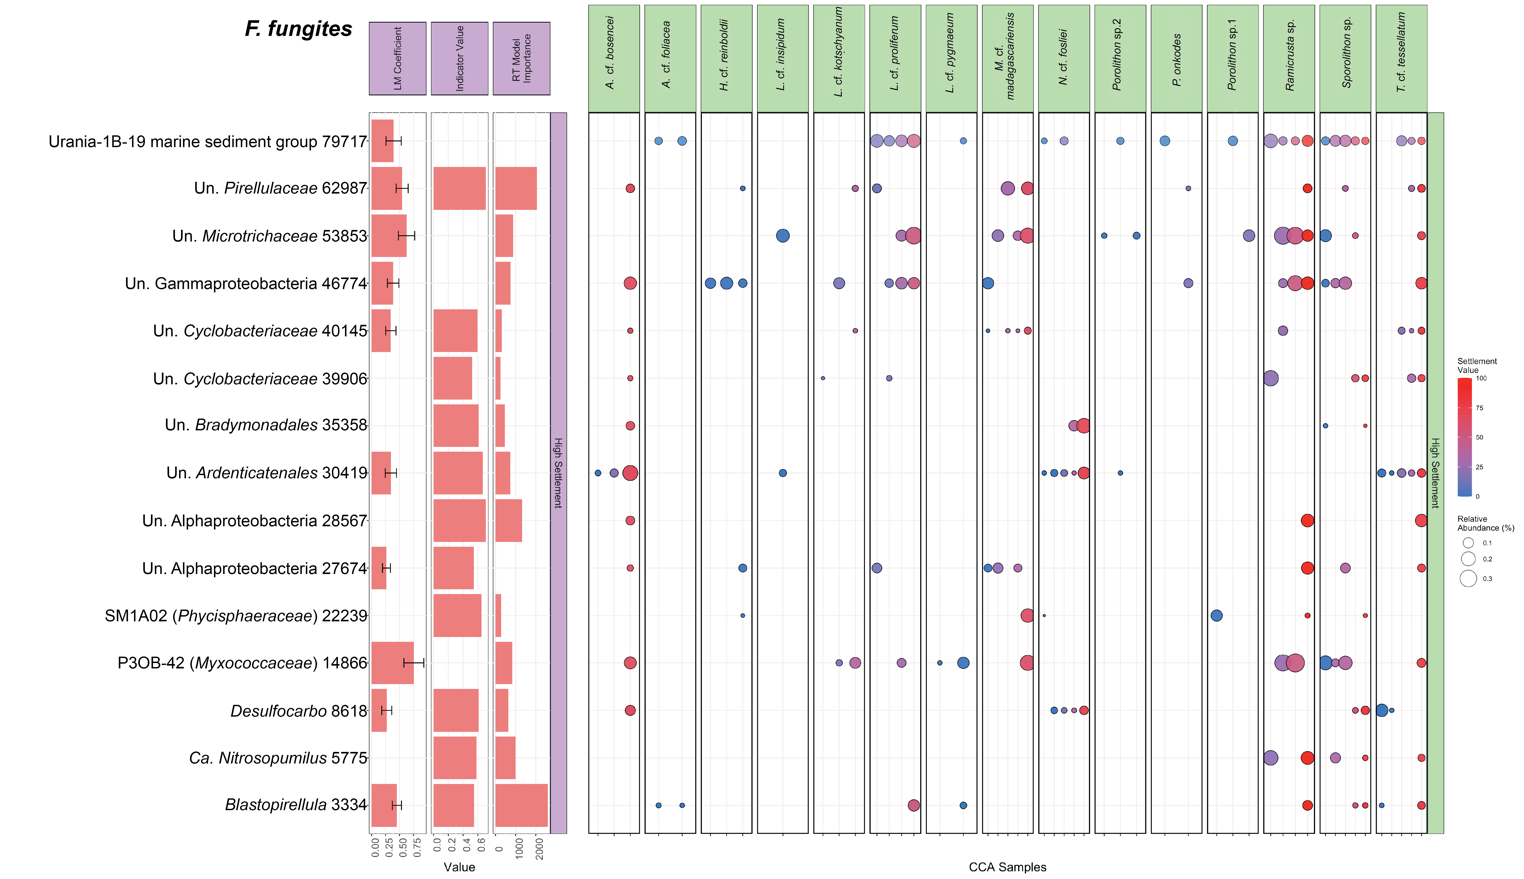


Figure S8. Amplicon sequence variants (ASVs) of interest associated with high *F. fungites* settlement. ASVs were deemed of interest if they had significant results in two out of the four methods used (Linear models, differential abundance, indicator species, and random forest analyses). Method results are visualised as bars for each ASV, and the greater the method value the more associated the ASV is with high or low settlement samples. ASV distribution is visualised across all samples grouped by crustose coralline algae in the bubble plot. The size of the bubble corresponds to the ASVs relative abundance, and the colour refers to the settlement score in the given sample (Red = high settlement, Blue = low settlement). Each ASV is labeled with an arbitrary number to differentiate individual ASVs across the entire dataset. No ASVs were identified with significant differential abundance between settlement categories.

***Goniastrea favulus***

There was a significant difference between the high and low settlement crustose coralline algae (CCA) microbial communities (PERMANOVA: F=1.97, p<0.04), with specific amplicon sequence variants (ASVs) found from a combination of linear models, differential abundance, indicator species, and random forest (RF) analyses. Six ASVs were associated with high settlement and only two of those ASVs, an unassigned *Rhizobiaceae* and *Neptuniibacter* ASV, were found in at least one sample from every single CCA species with a higher abundance in high settlement samples (Figure S9). Seven ASVs were associated with low settlement with three unassigned *Rhodobacteraceae* ASVs found in at least one sample from most CCA species (Figure S9). The other low settlement associated ASVs were more sporadic amongst the different CCA samples with them being all present in *A.* cf. *foliacea* and *L.* cf. *pygmaeum* low settlement samples (Figures S9).


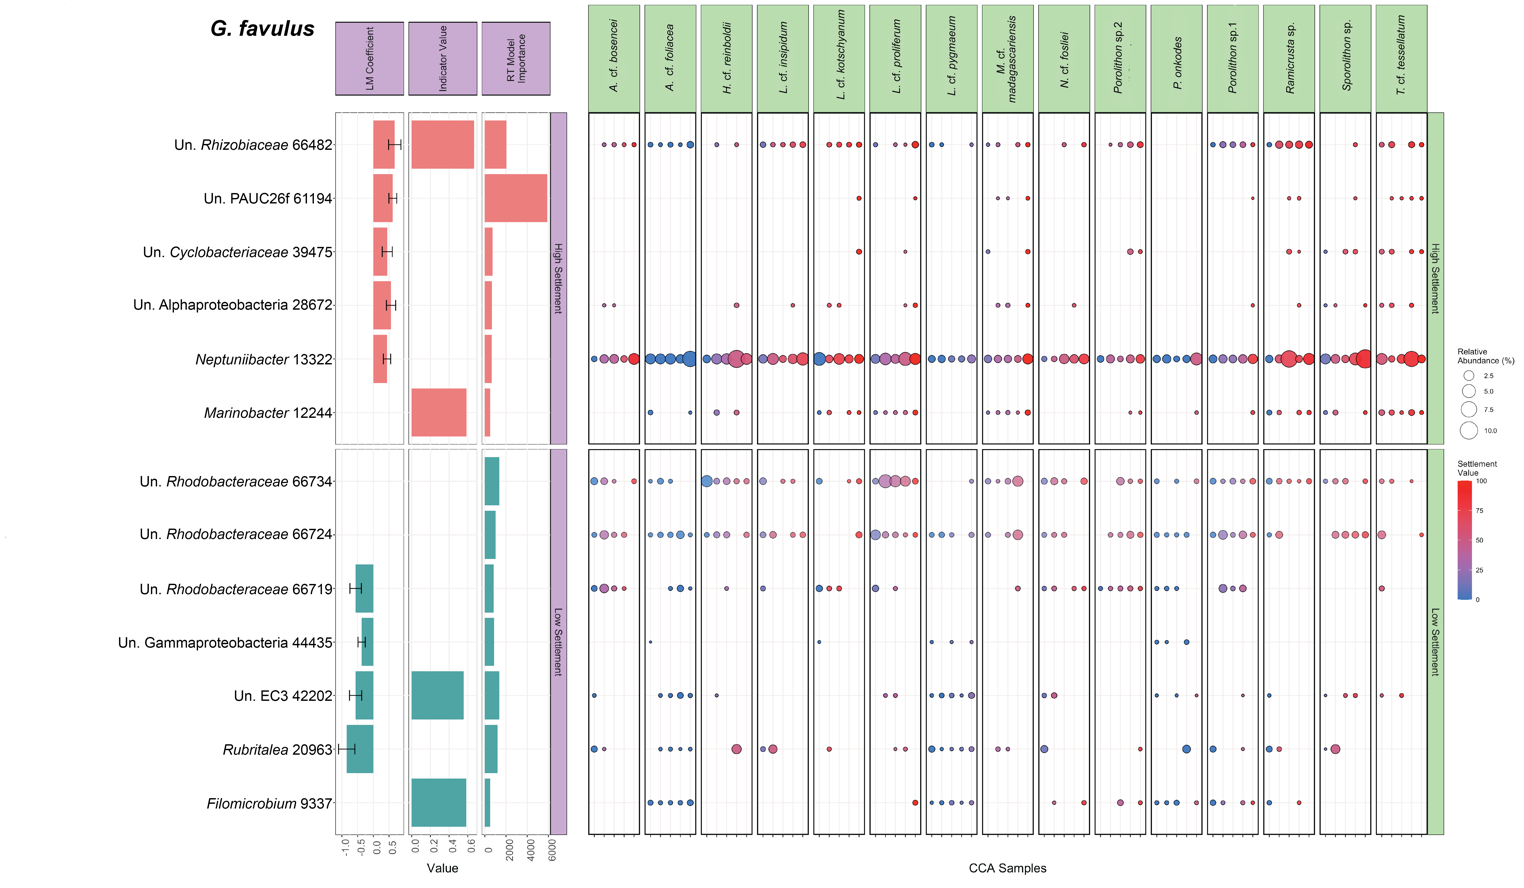


Figure S9. Amplicon sequence variants (ASVs) of interest associated with high and low *F. favulus* settlement. ASVs were deemed of interest if they had significant results in two out of the four methods used (Linear models, differential abundance, indicator species, and random forest analyses). Method results are visualised as bars for each ASV, and the greater the method value the more associated the ASV is with high or low settlement samples. No ASVs were significantly differential abundant in either high or low settlement. ASV distribution is visualised across all samples grouped by crustose coralline algae in the bubble plot. The size of the bubble corresponds to the ASVs relative abundance, and the colour refers to the settlement score in the given sample (Red = high settlement, Blue = low settlement). Each ASV is labeled with an arbitrary number to differentiate individual ASVs across the entire dataset.

***Lobophyllia corymbosa***

There was a significant difference between the high and low settlement crustose coralline algae (CCA) microbial communities (PERMANOVA: F=2.35, p<0.001), with specific amplicon sequence variants (ASVs) found from a combination of linear models, differential abundance, indicator species, and random forest (RF) analyses. There were 15 ASVs associated with high settlement with only an unassigned *Methyloligellaceae* and a *Neptuniibacter* ASV being present in at least one sample from every single CCA species with higher relative abundances in high settlement samples (Figure S10). A majority of the high settlement ASVs were present in high settlement CCA *M.* cf. *madagascariensis*. Furthermore, 17 ASVs were associated with low settlement and were mainly concentrated in low settlement *A.* cf. *foliacea, L.* cf. *pygmaeum, Porolithon* sp.2, and *P. onkodes* samples (Figures S10).


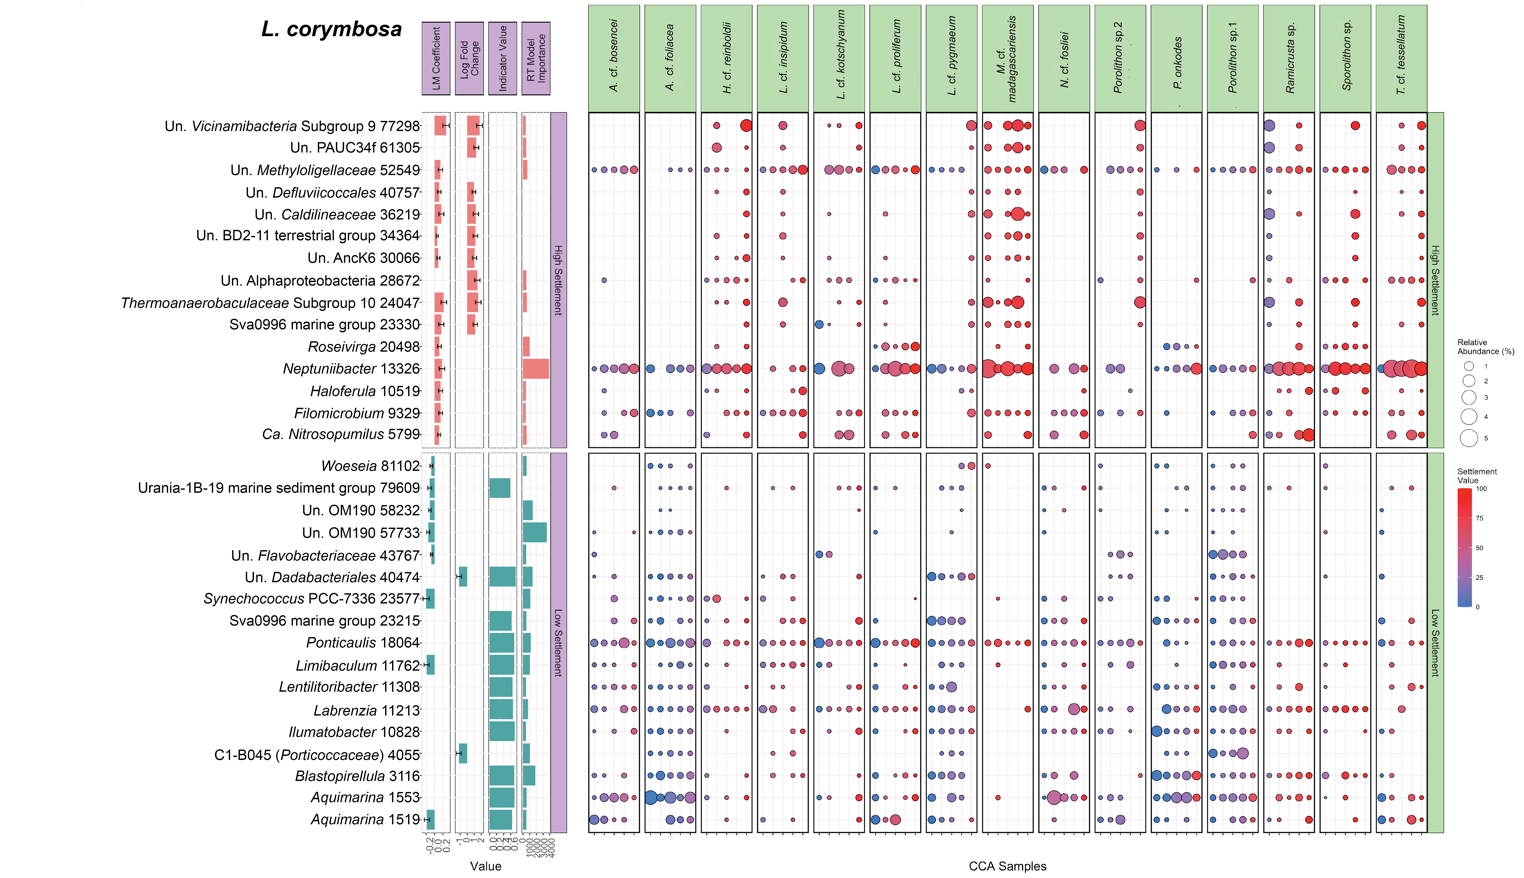


Figure S10. Amplicon sequence variants (ASVs) of interest associated with high and low *L. corymbosa* settlement. ASVs were deemed of interest if they had significant results in two out of the four methods used (Linear models, differential abundance, indicator species, and random forest analyses). Method results are visualised as bars for each ASV, and the greater the method value the more associated the ASV is with high or low settlement samples. ASV distribution is visualised across all samples grouped by crustose coralline algae in the bubble plot. The size of the bubble corresponds to the ASVs relative abundance, and the colour refers to the settlement score in the given sample (Red = high settlement, Blue = low settlement). Each ASV is labeled with an arbitrary number to differentiate individual ASVs across the entire dataset.

***Montipora aequituberculata***

There was a significant difference between the high and low settlement crustose coralline algae (CCA) microbial communities (PERMANOVA: F=2.23, p<0.001), with specific amplicon sequence variants (ASVs) found from a combination of linear models, differential abundance, indicator species, and random forest (RF) analyses. Only one unassigned *Rhodobacteraceae* ASV was found to be associated with high larval settlement, and was only present in *A.* cf. *bosencei, L.* cf. *insipidium, L.* cf. *kotschyanum, Ramicrusta* sp., *Porolithon* sp.1, *Porolithon* sp.2, and *P. onkodes* samples (Figure S11). Eight ASVs were associated with low settlement and consisted of *Rhodobacteraceae, Flavobacteriaceae, Saprospiraceae,* and *Kiloniellaceae* (Figure S11). These ASVs were mainly present in low settlement *A.* cf. *foliacea*, *L.* cf. *proliferum*, and *L.* cf. *pygmaeum* samples, but were sporadically present in low settlement samples of other CCA species.


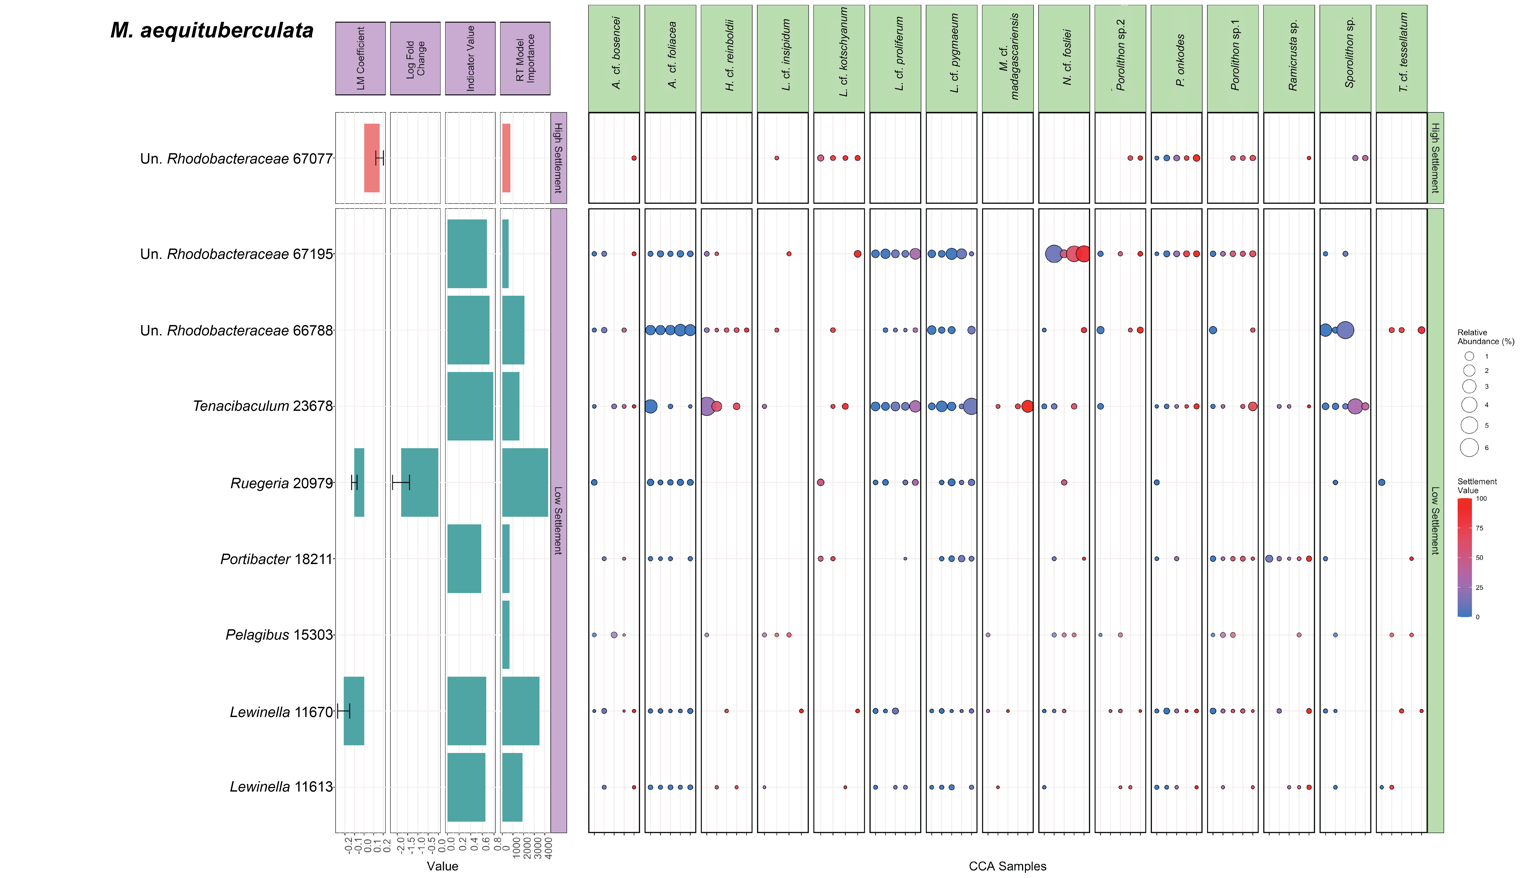


Figure S11. Amplicon sequence variants (ASVs) of interest associated with high and low *M. aequituberculata* settlement. ASVs were deemed of interest if they had significant results in two out of the four methods used (Linear models, differential abundance, indicator species, and random forest analyses). Method results are visualised as bars for each ASV, and the greater the method value the more associated the ASV is with high or low settlement samples. ASV distribution is visualised across all samples grouped by crustose coralline algae in the bubble plot. The size of the bubble corresponds to the ASVs relative abundance, and the colour refers to the settlement score in the given sample (Red = high settlement, Blue = low settlement). Each ASV is labeled with an arbitrary number to differentiate individual ASVs across the entire dataset.

***Mycedium elephantotus***

There was a significant difference between the high and low settlement crustose coralline algae (CCA) microbial communities (PERMANOVA: F=2.56, p<0.001), with specific amplicon sequence variants (ASVs) found from a combination of linear models, differential abundance, indicator species, and random forest (RF) analyses. Eight ASVs including two Neptuniibacter ASVs, were found associated with high settlement (Figure S12). These taxa were largely found in high settlement CCA samples of *H.* cf. *reinboldii, L.* cf. *kotschyanum, L.* cf. *proliferum, M.* cf. *madagascariensis, Ramicrusta* sp., *Sporolithon* sp. and *T.* cf. *tessellatum* (Figure S12). Forty ASVs were associated with low settlement including four *Blastopirellula* ASVs, and all of these ASVs were present in low settlement samples of *A.* cf. *foliacea, L.* cf. *pygmaeum,* and *Porolithon* sp.1 (Figures S12).


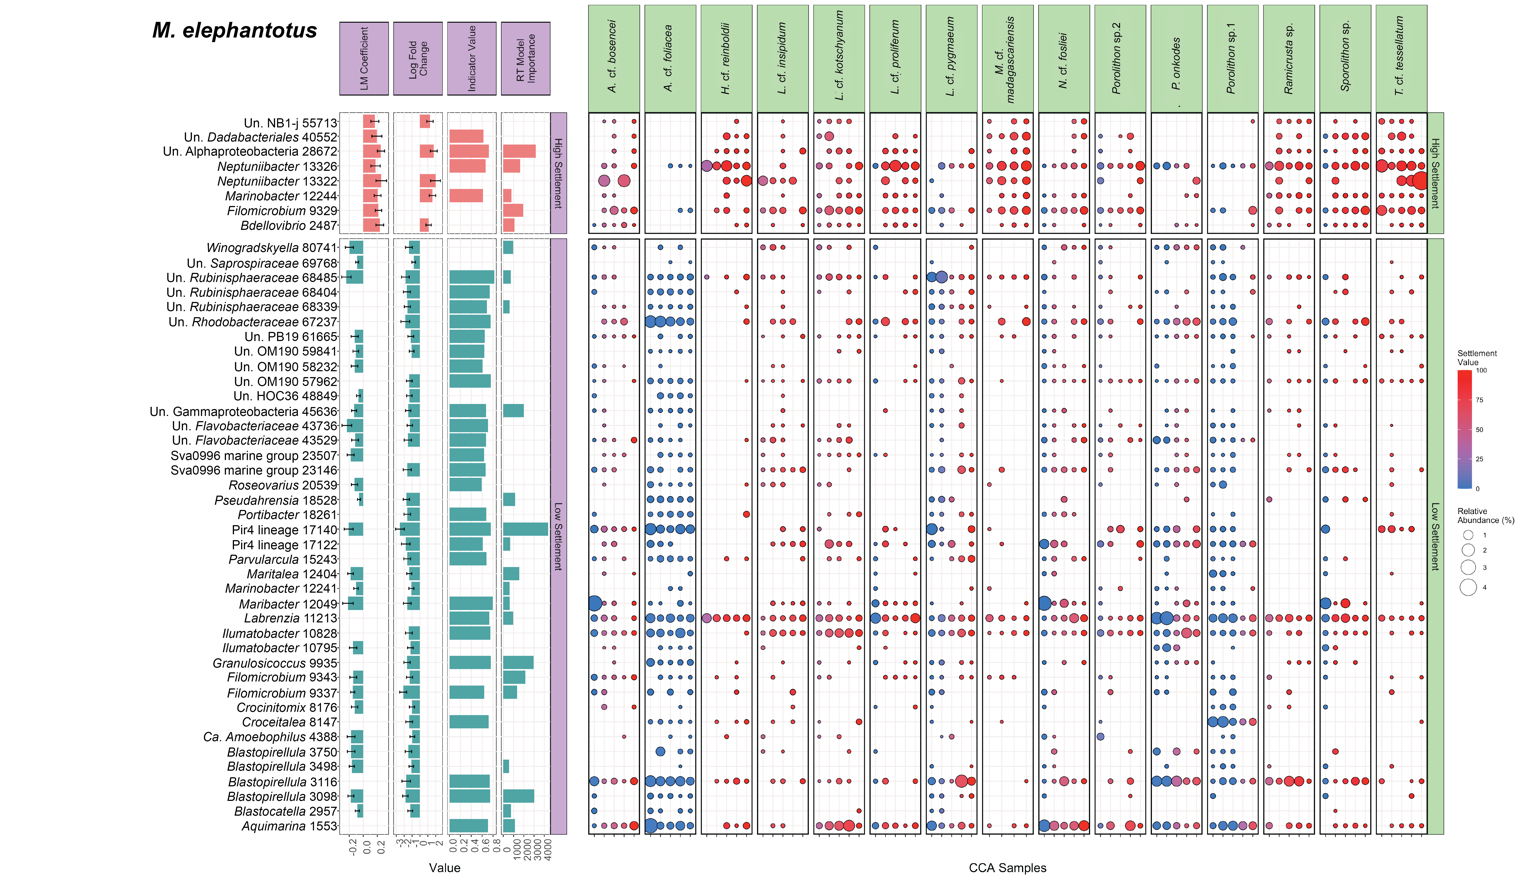


Figure S12. Amplicon sequence variants (ASVs) of interest associated with high and low *M. elephantotus* settlement. ASVs were deemed of interest if they had significant results in two out of the four methods used (Linear models, differential abundance, indicator species, and random forest analyses). Method results are visualised as bars for each ASV, and the greater the method value the more associated the ASV is with high or low settlement samples. ASV distribution is visualised across all samples grouped by crustose coralline algae in the bubble plot. The size of the bubble corresponds to the ASVs relative abundance, and the colour refers to the settlement score in the given sample (Red = high settlement, Blue = low settlement). Each ASV is labeled with an arbitrary number to differentiate individual ASVs across the entire dataset.

***Platygyra daedalea***

There was no significant difference between the high and low settlement crustose coralline algae (CCA) microbial communities (PERMANOVA: F=1.09, p=0.239) and likely not responding to microbial cues. Thirteen ASVs associated with high settlement were identified with having significant results in at least two analyses of linear models, indicator species, differential abundance, and/or random tree analysis, however, the sample distribution between high settlement (n = 68) and low settlement samples (n = 4) is disproportionate and therefore might introduce some bias to these results (Figure S13).


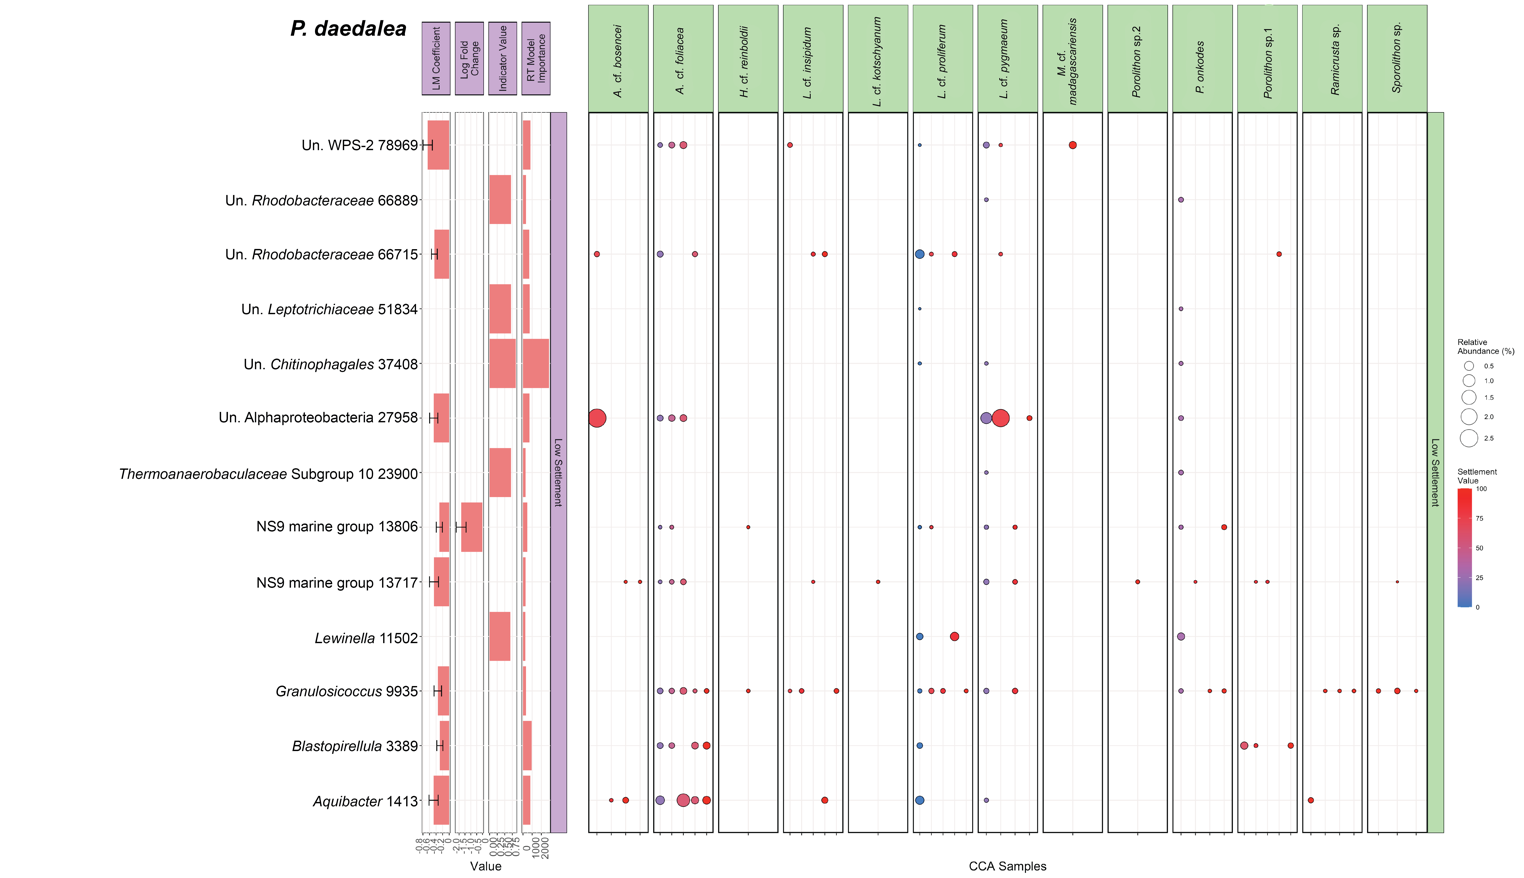


Figure S13. Amplicon sequence variants (ASVs) of interest associated with high *P. daedalea* settlement. ASVs were deemed of interest if they had significant results in two out of the four methods used (Linear models, differential abundance, indicator species, and random forest analyses). Method results are visualised as bars for each ASV, and the greater the method value the more associated the ASV is with high or low settlement samples. ASV distribution is visualised across all samples grouped by crustose coralline algae in the bubble plot. The size of the bubble corresponds to the ASVs relative abundance, and the colour refers to the settlement score in the given sample (Red = high settlement, Blue = low settlement). Each ASV is labeled with an arbitrary number to differentiate individual ASVs across the entire dataset.

***Platygrya sinensis***

There was a significant difference between the high and low settlement crustose coralline algae (CCA) microbial communities (PERMANOVA: F=2.27, p<0.001), with specific amplicon sequence variants (ASVs) found from a combination of linear models, differential abundance, indicator species, and random forest (RF) analyses. Ten ASVs were associated with high settlement, which included ASVs from the taxa *Kiloniellaceae, Nitrincolaceae, Saprospiraceae, Hyphomicrobiaceae, Nitrosopumilaceae, and* an unassigned *Thalassobaculales* (Figure S14). A majority of these ASVs were absent form *A.* cf. *foliacea* and *L.* cf. *pygmaeum* samples, except for a *Neptuniibacter* ASV, which had higher abundances in high settlement samples (Figure S14). Forty-seven ASVs were associated with low settlement and were mainly found in *A.* cf. *foliacea* and *L.* cf. *pygmaeum* CCA samples (Figure S14).


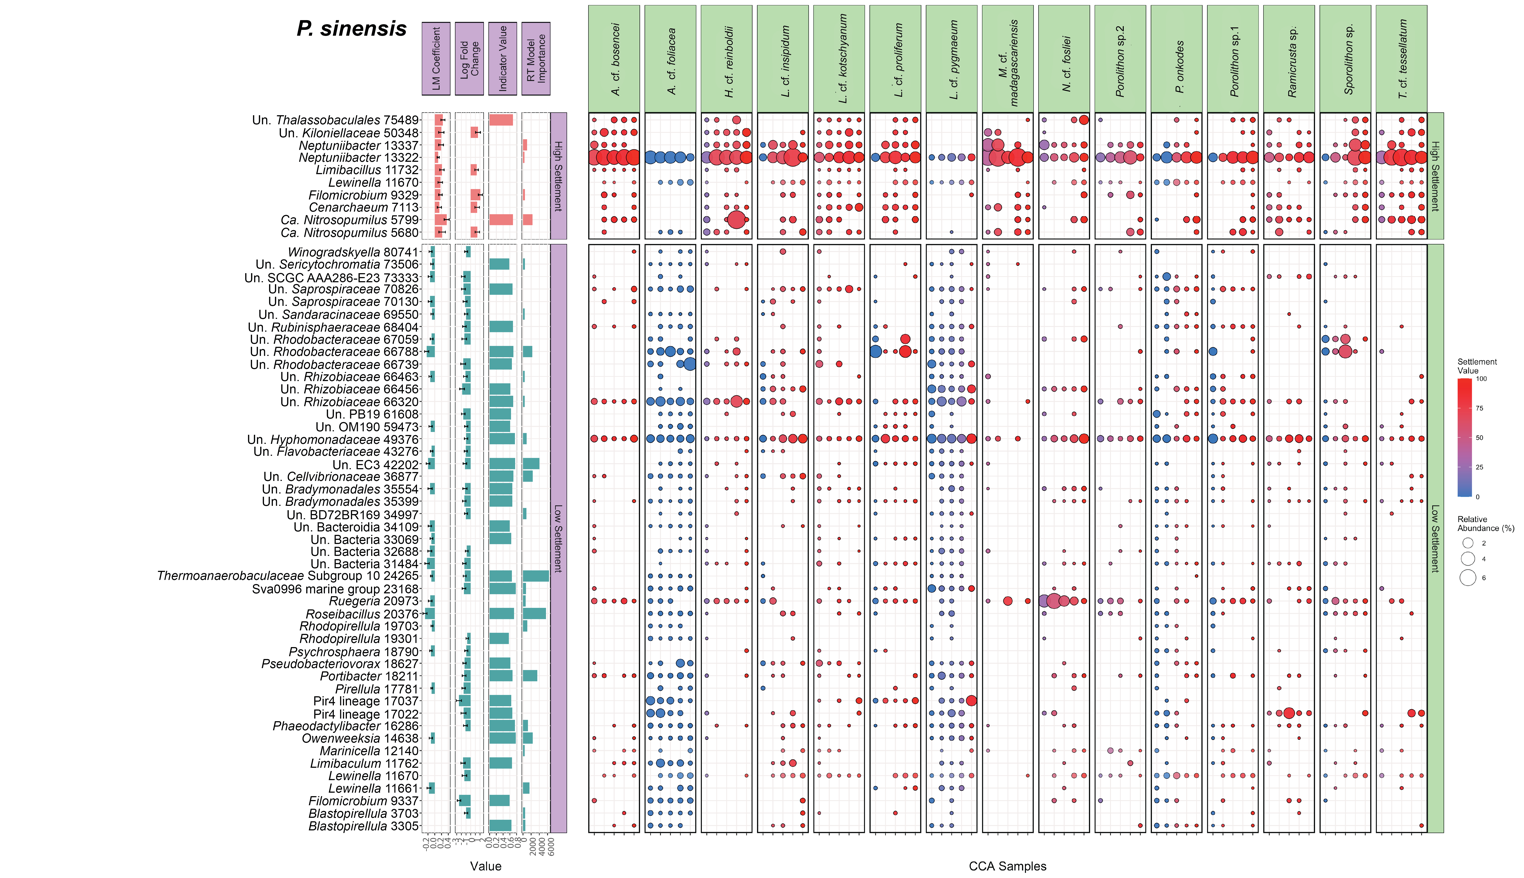


Figure S14. Amplicon sequence variants (ASVs) of interest associated with high and low *P. sinensis* settlement. ASVs were deemed of interest if they had significant results in two out of the four methods used (Linear models, differential abundance, indicator species, and random forest analyses). Method results are visualised as bars for each ASV, and the greater the method value the more associated the ASV is with high or low settlement samples. ASV distribution is visualised across all samples grouped by crustose coralline algae in the bubble plot. The size of the bubble corresponds to the ASVs relative abundance, and the colour refers to the settlement score in the given sample (Red = high settlement, Blue = low settlement). Each ASV is labeled with an arbitrary number to differentiate individual ASVs across the entire dataset.

***Porites lobata***

There was no significant difference between the high and low settlement crustose coralline algae (CCA) microbial communities (PERMANOVA: F=1.14, p=181) and likely not responding to microbial cues. Three ASVs associated with high settlement were only found significant with indicator species and random tree analysis (Figure S15).


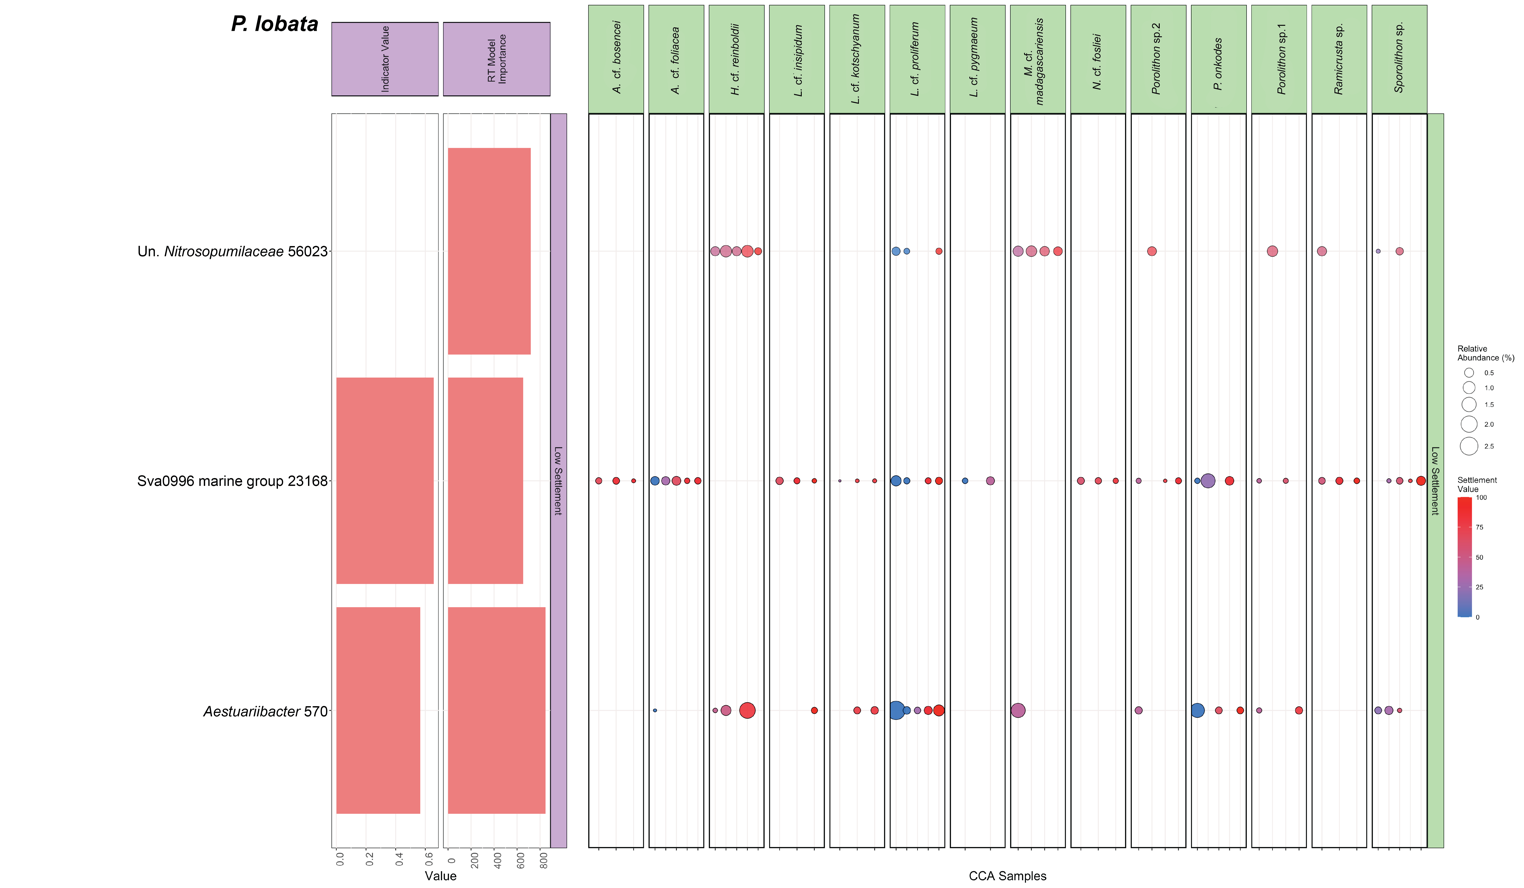


Figure S15. Amplicon sequence variants (ASVs) of interest associated with high *P. lobata* settlement. ASVs were deemed of interest if they had significant results in two out of the four methods used (Linear models, differential abundance, indicator species, and random forest analyses). Method results are visualised as bars for each ASV, and the greater the method value the more associated the ASV is with high or low settlement samples. ASV distribution is visualised across all samples grouped by crustose coralline algae in the bubble plot. The size of the bubble corresponds to the ASVs relative abundance, and the colour refers to the settlement score in the given sample (Red = high settlement, Blue = low settlement). Each ASV is labeled with an arbitrary number to differentiate individual ASVs across the entire dataset. No ASVs were significantly associated with settlement in the linear models and differential abundance analysis.

Abdul Wahab M, Ferguson S, Snekkevik VK, McCutchan G, Jeong S, Severati A, Randall CJ, Negri AP & Diaz-Pulido G (2023) Hierarchical settlement behaviours of coral larvae to common coralline algae. *Scientific Reports* **13**: 5795.
